1 **Short Title: VEE complex, MADV and EEEV**

2

3 **Venezuelan equine encephalitis complex, Madariaga and Eastern equine**  
4 **encephalitis viruses genome detection in human and mosquito populations**

5

6 Jean-Paul Carrera<sup>1,2,3,4#</sup>, Dimelza Araúz<sup>3</sup>, Alejandra Rojas<sup>5</sup>, Fátima Cardozo<sup>5</sup>, Victoria

7 Stittleburg<sup>6</sup>, Ingra Morales Claro<sup>7,9</sup>, Josefrancisco Galue<sup>3,4</sup>, Carlos Lezcano-Coba<sup>3,4</sup>, Filipe

8 Romero Rebello Moreira<sup>8,9</sup>, Luis Felipe-Rivera<sup>3,4</sup>, Maria Chen-Germán<sup>3</sup>, Brechla Moreno<sup>3</sup>, Zeuz

9 Capitan-Barrios<sup>3,4,10</sup>, Sandra López-Vérges<sup>3</sup>, Juan Miguel Pascale<sup>11</sup>, Ester C. Sabino<sup>7</sup>, Anayansi

10 Valderrama<sup>4,12</sup>, Kathryn A. Hanley<sup>13</sup>, Christl A. Donnelly<sup>2,9,14</sup>, Nikos Vasilakis<sup>+15, 16,17,18,19,20,</sup>

11 Nuno R. Faria<sup>+1,7,9</sup>, Jesse J. Waggoner<sup>+6,21,#</sup>

12

13 1. Department of Biology, University of Oxford, Oxford, United Kingdom

14 2. Pandemic Sciences Institute, Nuffield Department of Medicine, University of Oxford,  
15 Oxford, United Kingdom

16 3. Department of Research in Virology and Biotechnology, Gorgas Memorial Institute of  
17 Health Studies, Panama City, Panama

18 4. Viral Emerging Disease Dynamics group, Gorgas Memorial Institute of Health Studies,  
19 Panama City, Panama

20 5. Universidad Nacional de Asunción, Instituto de Investigaciones en Ciencias de la Salud,  
21 Departamento de Producción, Paraguay

22 6. Emory University, Department of Medicine, Division of Infectious Diseases, Atlanta,  
23 Georgia, USA

- 24 7. Instituto de Medicina Tropical, Faculdade de Medicina da Universidade de São Paulo,  
25 São Paulo, Brazil
- 26 8. Departamento de Genética, Universidade Federal do Rio de Janeiro, Brazil
- 27 9. MRC Centre for Global Infectious Disease Analysis (MRC-GIDA), Department of  
28 Infectious Disease Epidemiology, Imperial College London, London United Kingdom
- 29 10. Departamento de Microbiología y Parasitología, Facultad de Ciencias Naturales, Exactas  
30 y Tecnología, Universidad de Panamá, Ciudad de Panamá, Panamá
- 31 11. Clinical of Tropical Diseases and Research Unit, Gorgas Memorial Institute of Health  
32 Studies, Panama City, Panama
- 33 12. Department of Medical Entomology, Gorgas Memorial Institute of Health Studies,  
34 Panama City, Panama
- 35 13. Department of Biology, New Mexico State University, Las Cruces, New Mexico, USA
- 36 14. Department of Statistics, University of Oxford, Oxford, United Kingdom
- 37 15. Department of Pathology, The University of Texas Medical Branch, Galveston, Texas,  
38 USA
- 39 16. Department of Preventive Medicine and Population Health, The University of Texas  
40 Medical Branch, Galveston, Texas, USA.
- 41 17. Center for Biodefense and Emerging Infectious Diseases, The University of Texas  
42 Medical Branch, Galveston, Texas, USA.
- 43 18. Center for Vector-Borne and Zoonotic Diseases, The University of Texas Medical  
44 Branch, Galveston, Texas, USA.
- 45 19. Center for Tropical Diseases, The University of Texas Medical Branch, Galveston,  
46 Texas, USA.

47 20. Institute for Human Infection and Immunity, The University of Texas Medical Branch,  
48 Galveston, Texas, USA.

49 21. Rollins School of Public Health, Department of Global Health, Atlanta, Georgia, USA

50

51 #Address correspondence to: Jean-Paul Carrera, Peter Medawar Building for Pathogen Research,

52 Oxford, UK, OX1 3SY. Email: [jean.carrera@biology.ox.ac.uk](mailto:jean.carrera@biology.ox.ac.uk); [jpcarrera@gorgas.gob.pa](mailto:jpcarrera@gorgas.gob.pa) or

53 Jesse J. Waggoner, 1760 Haygood Drive NE, Room E-169, Bay E-1, Atlanta, GA, USA, 30322.

54 Email: [jjwaggo@emory.edu](mailto:jjwaggo@emory.edu); Telephone: +1 (404) 712-2360.

55

56 +joint senior authors

57

58 Word Count: Abstract, 231; Manuscript, 4509

59 Inserts: Tables 4, Figure 4

60

## 61 **Abstract**

62 Eastern equine encephalitis virus (EEEV), Madariaga virus (MADV) and Venezuelan equine  
63 encephalitis virus complex (VEEV) are New World mosquito-borne alphaviruses and cause  
64 severe neurological disease in human and equine hosts. However, their detection during the acute  
65 phase is complicated by non-specific clinical manifestations and lack of available diagnostic  
66 tools. To develop and clinically evaluate rRT-PCRs for VEEV complex, MADV and EEEV,  
67 primers and probes were designed from publicly available whole-genome sequences. The rRT-  
68 PCRs were validated using 15 retrospective serum samples from febrile patients collected during  
69 the 2015 and 2017 alphavirus outbreaks in Panama. In addition, the protocol was validated with

70 150 mosquito pools from 2015, and with 118 samples from prospective disease surveillance from  
71 2021 and 2022. The rRT-PCRs detected VEEV complex RNA in 10 samples (66.7%) from the  
72 2015 and 2017 outbreaks, and in one of these ten samples, both VEEV complex and MADV  
73 RNAs were detected. Additionally, VEEV complex RNA was detected in 5 suspected dengue  
74 from prospective disease surveillance. The rRT-PCR assays detected VEEV complex RNA in 3  
75 from *Culex (Melanoconion) vomerifer* pools, 2 of which yielded VEEV isolates. Untargeted  
76 sequencing and phylogenetic analysis identified VEEV ID subtype in  
77 seven VEEV complex RNA positive sample. The VEEV complex, MADV and EEEV rRT-  
78 PCRs provide accurate detection while yielding significant benefits over currently available  
79 molecular methods. Our results suggest that 11.9% of suspected dengue cases in Panama are  
80 VEEV infections.

81  
82 **Keywords:** Venezuelan equine encephalitis, Madariaga virus, Eastern equine encephalitis virus,  
83 alphavirus, rRT-PCR.

84

## 85 **Introduction**

86 New World alphaviruses (*Togaviridae*, genus *Alphavirus*) comprise a diverse group of mosquito-  
87 borne viruses that can cause severe disease in humans, including the Venezuelan equine  
88 encephalitis virus complex (VEEV complex), Madariaga virus (MADV), and eastern equine  
89 encephalitis virus (EEEV)(1). These have single-stranded 11.7kb RNA genomes that encode four  
90 non-structural proteins (nsP1 to nsP4) and five structural proteins (capsid, E1, E2, E3 and 6K) (1,  
91 2). VEEV complex, MADV and EEEV persist in sylvatic-enzootic cycles throughout the

92 Americas and are transmitted to humans by *Aedes spp.*, *Psorophora spp.* and *Culex spp.*  
93 mosquitoes (2, 3).

94  
95 Serologic and molecular evidence of VEEV complex infections have been identified throughout  
96 tropical regions of Central and South America, suggesting VEEV complex infections may be  
97 relatively common but remain largely underdiagnosed(2) . There is a high genetic variability  
98 within the VEEV complex, with at least 14 different viral subtypes identified to date (2). VEEV  
99 complex subtypes have been associated with large epizootic outbreaks involving equids and  
100 humans (VEEV subtypes IAB and IC)(1, 2). Although most infections in humans are  
101 asymptomatic or subclinical, patients may develop acute febrile illness with headache, myalgias,  
102 arthralgias, nausea, and vomiting (4, 5), which may progress to severe disease including  
103 encephalitis and the development of long-term neurologic sequelae(5, 6).

104  
105 MADV, previously classified as South American EEEV, is an emerging virus that was first  
106 associated with large outbreaks in 2010 in the Darién province of Panamá (5), where VEEV  
107 subtype ID has also been detected(7). Before the 2010 outbreak in Panama, MADV was mostly  
108 associated with equine disease and only a few human infections had been detected in Trinidad  
109 and Tobago and Brazil(8, 9). This contrasts with the epidemiological profile of the North  
110 American EEEV, which is associated with severe and fatal human cases(3). Diagnostic tools are  
111 not widely available for MADV, and its prevalence outside of the Darién province in Panama  
112 remains poorly characterized(10). Geographic expansion of the Panamanian MADV strain into  
113 Northeast Brazil and Haiti has been reported recently, highlighting the potential of MADV to  
114 invade new areas (11, 12).

115 Accurate detection of VEEV complex, MADV and EEEV infections in the acute phase is  
116 complicated by their non-specific clinical manifestations and lack of widely available diagnostic  
117 tools. Antigen-based methods are currently unavailable, and although serology can confirm the  
118 diagnosis, this requires paired acute and convalescent samples (1, 5). Current molecular tests  
119 lack optimal performance characteristics necessary for routine diagnostic testing (13–19).  
120 Molecular assay designs have been complicated by the genetic variability of the VEEV complex  
121 viruses(2). VEEV complex infections are often misdiagnosed as dengue virus, due to  
122 overlapping clinical symptoms during the acute phase (2), and the recent classification of MADV  
123 as a separate virus species and human pathogen further complicates the clinical diagnosis of  
124 both(3). Common molecular tests for the VEEV complex employ pan-alphavirus primers to  
125 amplify a region of 400-500 nucleotides region of the genome with subsequent identification of  
126 the viral complex or species by sequencing or nested polymerase chain reaction (PCR)(5, 13, 14,  
127 16, 18–20). Such methods are laborious and increase opportunities for laboratory contamination.  
128 In addition, pan-alphavirus primers and conventional reverse transcription-polymerase chain  
129 reaction (RT-PCR) chemistry may be less sensitive than real-time RT-PCR (rRT-PCR).  
130 Moreover, few rRT-PCR methods have been reported in the literature to date to detect and  
131 differentiate VEEV complex and MADV (21).

132  
133 The primary objective of the current study was to design sensitive rRT-PCRs diagnosis assay for  
134 the VEEV complex and MADV. As a secondary objective, a duplex MADV/EEEV rRT-PCR  
135 was developed to differentiate these two pathogens. The two assays, for VEEV complex and  
136 MADV/EEEV detection, were evaluated in a set of clinical samples from an alphavirus outbreak  
137 in Panamá and prospective disease surveillance. Finally, we characterized viral species, subtype

138 and genotype from selected rRT-PCR, positive samples from humans and mosquitoes collected  
139 during the 2015 and 2022 alphavirus outbreaks in Panama using metagenomic sequencing  
140 approach.

141

## 142 **Materials and Methods**

### 143 **Ethics statement**

144 The use of human samples used for protocol validation was approved by the Panamanian  
145 Ministry of Health (protocol number 2077), Gorgas's Institutional Review Board (IRB)  
146 (protocol: 335/CBI/ICGES/21), Emory University IRB (IRB00097089), and the Ethics  
147 Committee of the Instituto de Investigaciones en Ciencias de la Salud, Universidad Nacional de  
148 Asunción (P06/2017). Prospective disease surveillance was approved by the Gorgas's IRB  
149 (protocol:073/CBI/ICGES/21).

150

### 151 **Data availability**

152 All the data used for human and mosquito validation are contained within the manuscript.  
153 Accessions numbers of newly derived genomes are XXX. Accessions numbers and strains  
154 information of sequences used for primer design are shown in Supplementary Appendix.

155

### 156 **VEEV complex, EEEV and MADV rRT-PCR design**

157 Separate alignments were prepared for the VEEV complex, EEEV and MADV using all publicly  
158 available complete genome sequences from the NCBI GenBank (22) and aligned with MegAlign  
159 software (DNASTAR, Madison, WI). The VEEV complex alignment included all complete  
160 genomes from the following viruses: Cabassou, Everglades, Mosso das Pedras, Mucambo,

161 Pixuna, Rio Negro, Tonate, and VEEV subtypes (IAB, IC, ID, and IE). The VEEV complex  
162 alignments were compiled in 2016 (n=121 sequences); a similar alignment for MADV was  
163 compiled in 2019 (n=32). Primers and probes were designed with Primer3 software  
164 ([primer3.ut.ee](http://primer3.ut.ee)) such that each oligonucleotide contained  $\leq 1$  degenerate base and matched  $\geq 95\%$   
165 of available sequences for a given virus. In silico primer/probe specificity was checked by  
166 aligning sequences in BLAST ([blast.ncbi.nlm.nih.gov](http://blast.ncbi.nlm.nih.gov)) against (i) all available sequences and (ii)  
167 only alphavirus sequences while excluding the VEEV complex or MADV, respectively. Due to  
168 the similarity between MADV primers and EEEV sequences, all available EEEV complete  
169 genome sequences (n=441) were aligned and separate MADV and EEEV probes were designed  
170 for an rRT-PCR duplex assay. Alignments for each virus were repeated with all sequences  
171 available in September 2021 to confirm primer and probe sequences in contemporary strains.

172

### 173 **rRT-PCR assay performance and optimization**

174 rRT-PCRs were performed in 25 $\mu$ L reactions using the SuperScript III Platinum One-Step  
175 Quantitative RT-PCR Kit (Thermo Fisher, Waltham, MA) with 5 $\mu$ L of the nucleic acid template.  
176 The analytical evaluation was performed on a Rotor-Gene Q instrument (Qiagen, Germantown,  
177 MD), and the validation with serum and mosquito pool samples was performed on an ABI7500  
178 (Thermo Fisher). Cycling conditions were consistent with previous laboratory protocols: 52 °C  $\times$   
179 15 min, 94 °C  $\times$  2 min, and 45 cycles of 94 °C  $\times$  15 s, 55 °C  $\times$  40 s (acquired in all channels),  
180 and 68 °C  $\times$  20 s (1-4). Primer and probe sets were evaluated in singleplex reactions containing  
181 200nM of each oligonucleotide and genomic RNA or quantified ssDNA containing the target  
182 region. Primer/probe sets were selected to generate the most sensitive detection based on cycle



183 threshold (Ct) values, with preserved specificity. Primer and probe concentrations in the final  
184 reaction were then adjusted between 100nM and 400nM to optimize assay sensitivity.  
185 Primers were obtained from Integrated DNA Technologies (IDT, Coralville, Iowa); probes were  
186 obtained from Biosearch Technologies (Hoddesdon, United Kingdom). VEEV subtype IC and  
187 EEEV genomic RNAs were purchased from Vircell Microbiologists (Granada, Spain).  
188 Quantified ssDNA containing the assay target region (IDT, Coralville, Iowa) was used for all  
189 viruses to quantify analytical performance. For ssDNA synthesis, target region sequences were  
190 selected from specific strains of VEE subtype IAB (Accession number KC344505.2) and  
191 subtype IV (Pixuna virus, Accession number NC\_038673.1), MADV (Accession numbers  
192 MH359233.1 and KJ469626.1), and EEEV (Accession number KX029319.1).

193

#### 194 **Analytical evaluation**

195 The linear range of the assay was determined by testing synthesized targets from each reference  
196 strain in quadruplicate at 8.0, 6.0, 4.0, 2.0, and 1.0 log<sub>10</sub> copies/μL. The linear range was defined  
197 as the range of concentrations at which 1) all replicates were detected and 2) the linear regression  
198 of Ct values (y, dependent variable) versus log<sub>10</sub> copies/ μL (x, independent variable) generated  
199 an R<sup>2</sup> ≥ 0.99. For the VEEV complex, the lower limit 95% detection (95% LLOD) was  
200 determined by testing 10 replicates of 2-fold serial dilutions from 200 to 25 copies/μl. For  
201 MADV and EEEV, 95% LLOD was calculated directly from the linear range. Assay exclusivity  
202 was evaluated by testing genomic RNA from the following viruses (strain in parentheses, if  
203 designated): Rift Valley fever (h85/09); Zika (ZIKV; MR766); dengue virus serotype 1 (DENV1,  
204 Hawaii 1944), DENV2 (NGC), DENV3 (Sleman/78), and DENV4 (H241); chikungunya virus  
205 (CHIKVR80422); Mayaro virus (MAYV; ARV 0565, INHRR 11a-10); yellow fever virus

206 (YFV; 17D and Asibi strains); West Nile virus (WNV; NAL); St. Louis encephalitis virus  
207 (SLEV; GML 902612, CorAn 9275); tick-borne encephalitis virus (TBEV; Japanese encephalitis  
208 virus (JEV); Semliki Forest virus (SFV); Ross River virus (RRV); Getah virus (GETV); Barmah  
209 Forest virus (BFV); and Una virus (UNAV) (5). Specificity was also evaluated by testing 56  
210 serum samples from locations without known transmission of VEEV or MADV. These included  
211 8 samples collected from patients in Georgia, USA, without known travel history, and 48  
212 samples from individuals with an acute febrile illness in Asunción, Paraguay. The latter samples  
213 have been described in detail elsewhere (23). Total nucleic acids were extracted from 200 $\mu$ L of  
214 serum on an EMAG instrument (BioMérieux, Durham, NC), eluted in 50 $\mu$ L and run in the  
215 VEEV complex and MADV/EEEV rRT-PCRs.

216

## 217 **Statistics**

218 Linear regression fitting and linear range calculations, including  $R^2$  of the best-fit line were  
219 performed in Excel (Microsoft, Redmond, WA). Concentrations and replicates in the linear range  
220 study that did not yield Ct values were not included in the linear regression analysis. Probit  
221 analyses were performed using MedCalc, v20.013 (MedCalc Software, Belgium).

222

## 223 **Protocol validation with acute human samples**

224 Acute human samples used in the protocol validation were collected in communities of Darien,  
225 the eastern most province in Panama, during three alphavirus outbreaks in 2015, 2017. Cases  
226 identified in 2015 and 2017 were detected in the communities of Metetí, Cemaco, Tucutí,  
227 Yaviza, Nicanor, La Palma and El Real de Santa María (Figure 1A). The Darien province

228 borders Colombia and encompasses the Darien Gap, and the Darien National Park, a UNESCO-  
229 designated World Heritage Site(24).

230

### 231 **Patient recruitment in 2015 and 2017**

232 Febrile patients were identified during an enhanced surveillance program by our outbreak  
233 response team using house-by-house visits during the 2015 and 2017 outbreaks. Blood samples  
234 were drawn from patients that met the case definition during the outbreak investigation. The case  
235 definition of a suspected case included fever and headache, while a probable case was defined as  
236 a suspected case plus somnolence, lethargy, or convulsions. Blood samples were centrifuged in  
237 the field, and serum was stored in liquid nitrogen for transportation to the Gorgas Memorial  
238 Institute of Health Studies in Panama City.

239

### 240 **Prospective acute disease surveillance in 2021 and 2022**

241 In 2021 an effort for surveillance of emerging pathogens was established in Panama as part of  
242 the USA-National Institute of Allergy and Infectious Diseases (NIAID), Centers for Research in  
243 Emerging Infectious Diseases Network initiative. The **C**oordinating **R**esearch on **E**merging  
244 **A**rboviral **T**hreats **E**ncompassing the **N**eotropics (CREATE-NEO) in Panama undertakes acute  
245 febrile surveillance across ten Health Centers in Panama and Darien Provinces (Figure 1 B)  
246 (<https://www.utmb.edu/createneo/home/create-neo-home>). Cases, with malaria, human  
247 immunodeficiency virus (HIV), hepatitis B (HBV) and hepatitis (HCV), and >5 and <75 years  
248 old, presenting with no more than 7 days with rash, and at least one of the following symptoms:  
249 fever, myalgia, arthralgia, periarticular edema, and conjunctivitis were recruited, evaluated and

250 interviewed, to obtain clinical, and demographics characteristics and ethic consent at each health  
251 center.

252

### 253 **Laboratory testing for acute disease surveillance**

254 Acute samples (0-5 days) were first screened against DENV, CHIKV and ZIKV virus using rRT-  
255 PCR as described previously (25), followed by testing with the newly designed MADV/VEEV  
256 rRT-PCR.

257

### 258 **Mosquito collection**

259 Mosquito collections were performed in a forested section of 100 x 100 meters within El Real de  
260 Santa María (Figure 1 A). Acute VEEV cases were identified during the 2015 outbreak response  
261 in El Real de Santa María. Mosquito collections were undertaken with CDC light traps and  
262 performed over a period of 12 hours, from 6:00 pm to 6:00 am at a height of 1.5 m above ground  
263 level. Traps (BioQuip Products, Rancho Dominguez, CA) were baited with octanol and CO<sub>2</sub> for  
264 the encephalitis vector survey. The following day, mosquitoes were collected in the field and  
265 transported to the base camp where they were anesthetized, identified to the species level using  
266 taxonomic keys (26), and placed in cryovials for storage in liquid nitrogen. Mosquitos were  
267 grouped at the species level and a maximum of 20 individuals were used to produce mosquito  
268 pools for rRT-PCR, serology, and isolation.

269

### 270 **Alphavirus serology of clinical samples**

271 All human serum samples were tested in duplicate for IgM antibodies to MADV and VEEV  
272 antigen using an enzyme-linked immunosorbent assay (ELISA) and confirmed by a plaque-

273 reduction neutralization test (PRNT). For the ELISA, sucrose-acetone antigens were prepared  
274 from MADV- (prepared by Dr. Robert Shope at the Yale Arbovirus Research Unit in August  
275 1989) and VEEV- (strain TC-83) infected mouse brain. For the PRNT, we used chimeric Sindbis  
276 virus SINV/MADV (derived from Brazilian MADV strain BeAn436087 and shown to be an  
277 accurate surrogate for MADV in these assays (27) and TC83, an attenuated vaccine strain of  
278 VEEV closely related to subtype ID strains that circulate in Panama (7). The neutralizing  
279 antibody titer was determined as the reciprocal of the highest dilution that reduced plaque count  
280 by 80% (PRNT<sub>80</sub>).

281

### 282 **Viral isolation from mosquito pools**

283 Mosquito pool homogenates were prepared with 20 – 50 mosquitoes in 2 mL of minimum  
284 essential medium supplemented with penicillin and streptomycin, and 20% fetal bovine serum,  
285 homogenized using a Tissue Lyser (Qiagen, Hidden, Germany), and centrifuged at 12000 rpm  
286 for 10 mins. A total of 200 µL of serum or mosquito homogenate was inoculated in each of two  
287 12.5-cm<sup>2</sup> flasks of Vero cells. Samples were passed twice and monitored for cytopathic effect  
288 (CPE).

289

### 290 **Generic alphavirus RT-PCR for human and mosquito samples**

291 Viral RNA was extracted from human sera and mosquito pool homogenates using QIAamp RNA  
292 viral extraction kit (Qiagen, Valencia, CA). Viral RNA from mosquitoes was also extracted  
293 using the Macherey-Nagel extraction kit (Düren, Germany). Sera and mosquito homogenates  
294 were tested in 25µL reactions for alphaviruses using a universal alphavirus RT-PCR, as  
295 previously described (19).

## 296 **Viral metagenomic sequencing**

297 To confirm virus species, subtype and genotype, we sequenced seven selected VEEV complex  
298 rRT-PCR positive mosquito and human samples from 2015 and 2022 using SMART-9N  
299 metagenomic sequencing as previously described (28). In brief, viral RNA was treated with  
300 TURBO DNase (Thermo Fisher Scientific, USA) and concentrated with Zymo RNA clean &  
301 concentrator-5 (Zymo Research, USA) following protocol instructions. cDNA synthesis and  
302 PCR was performed as described (28). Fifty ng of the quantified PCR products were pooled  
303 using EXP-NBD104 (1-12) and EXP-NBD114 (13-24) Native Barcoding Kits (ONT, UK).  
304 Sequencing libraries were generated using the SQK-LSK109 kit (ONT, UK) and loaded onto  
305 FLO-MIN106 flow cells on the GridION device (ONT, UK). Sequencing base-calling and  
306 demultiplexing was performed by MinKNOW with the standard 48-hour run script (ONT, UK).  
307 Demultiplexed FASTQ files were aligned and mapped to the VEEV reference genome (GenBank  
308 accession no. NC\_001449.1) using minimap2 version 2.28. (29) and converted to sorted BAM  
309 file using SaMtool(30). NanoStat version 1.1.2.4,(31) and Tablet (32) were used to compute  
310 genomic statistics. Variants were detected with medaka\_variants and consensus sequences were  
311 built with margining\_medaka\_consensus (ONT, UK). Genomic regions with <20x coverage were  
312 masked.

313

## 314 **VEEV Phylogenetic analysis**

315 All available VEEV genome sequences, in GenBank, representing all antigenic complex were  
316 selected to construct the alignment, duplicated sequences, partial sequences and overlapping  
317 sequences were removed. Finally, the novel complete or near complete VEEV genome  
318 sequences (n=7) were aligned with 132 representative VEEV genomes retrieved from NCBI

319 GenBank using MAFFT version 7 (33). Selection of the best-fitting nucleotide substitution  
320 model and maximum likelihood phylogenetic reconstruction were performed with IQ-Tree  
321 v2.2.0.3(34). Statistical robustness of the tree topology was assessed with 1,000 ultrafast  
322 bootstrap replicates.

323

## 324 **Results**

### 325 **rRT-PCR analytical evaluation**

326 Primers and probes for the VEE complex singleplex and MADV/EEEV duplex rRT-PCRs are  
327 shown in Table 1 along with the optimized final reaction concentrations. The linear range for  
328 each assay extended from 2.0 to 8.0 log<sub>10</sub> copies/μL (Figure 2A-D). For the VEEV complex  
329 assay, the linear range was evaluated with ssDNA for subtypes IAB and IV and RNA from  
330 subtype IC (2.0 to 5.0 log<sub>10</sub> copies/μL; Figure 1A-B). The 95% LLODs, expressed in copies/μL,  
331 were: VEEV subtype IAB, 120; VEE subtype IV, 110; MADV, 19; EEEV, 19. Assay exclusivity  
332 was evaluated by testing genomic RNA from VEEV subtype IC, EEEV, and a set of arboviruses,  
333 including flavi-, bunya-, and alphaviruses on a single run of the VEEV complex and  
334 MADV/EEEV rRT-PCRs. VEEV complex and EEEV only yielded signals in the respective  
335 assays for these viruses. None of the other tested viruses generated signal in either assay. In  
336 addition, none of the 56 serum samples from Georgia, USA, or Asunción, Paraguay, tested  
337 positive in either assay.

338

### 339 **Validation with clinical samples**

340 A total of 15 febrile patients from 2015 and 2017 alphavirus outbreaks that met the suspected or  
341 probable case definition were used to validate the new molecular assays. Previously, a total of

342 eleven (11/15) acute sera samples collected during the in 2015 and 2017 alphavirus outbreaks  
343 had tested positive using a generic alphavirus RT-PCR and were confirmed later by sequencing  
344 as VEEV-ID infections (17). In 2021, a second round of generic alphavirus RT-PCR using the  
345 same set of primers was run on these 15 stored samples, and all of them tested negative. Notably,  
346 using the newly designed rRT-PCR, we were able to detect 10 VEEV complex RNA positive  
347 samples (Ct range: 27 – 38), including two samples that had tested negative at the initial  
348 screening in 2017 (Table 2). Three of the VEEV complex rRT-PCR-positive samples were also  
349 anti-VEEV IgG and IgM positive, with only 0, 2, and 3 days since the onset of symptoms,  
350 respectively (Table 2). One sample was rRT-PCR positive for both VEEV and MADV viruses.  
351

### 352 **Prospective disease surveillance**

353 A total of 118 febrile patients were recruited from November 16, 2021, to December 1, 2022. Of  
354 these 84 (71.2%) were acute patients with onset of symptoms ranging from 0-5 days. A total of  
355 42 patients (50.0 %) were DENV1 positive. We detected VEEV RNA (Ct range: 15-20) in five  
356 patients (11.9%; 95% CI: 4.0 – 25.6) with suspected dengue infection, one of which was from a  
357 fatal case in 2022. Details and results of disease surveillance are presented in Figure 3.  
358

### 359 **Viral detection in mosquito pools**

360 A total of 1307 mosquitoes belonging to 35 species and 12 genera were collected in the  
361 community of El Real de Santa Maria, Panama, during a period of five days in 2015 (table 3).  
362 The most abundant mosquito species was *Coquilletidia venezualensis* (37.5%, n=490 of 1307)  
363 and *Culex Melanoconion vomerifer* (34.4%, n=450 of 1307). Mosquito species, number of  
364 individuals and pools are shown in Table 3. Of 150 mosquito pools, 3 *Cx. (Mel.) vomerifer*



365 mosquito pools tested positive for VEEV by rRT-PCR (Ct range:26-30). Two of these rRT-PCR  
366 positive pools also yielded viral isolates.

367

### 368 **VEEV Subtype identification**

369 Three mosquito pools and 4 human samples (including one from a fatal case in 2022), that tested  
370 positive with the new VEEV complex rRT-PCR were sequenced using a virus untargeted  
371 approach (<https://wellcomeopenresearch.org/articles/6-241>). Twenty-fold genome coverage  
372 ranged from 45% to 100% (Table 4). Percentage of genome identity with VEEV reference strain  
373 ranged from 87.7% to 90.0% (Table 4), while identity with the Panamanian VEEV ID subtype  
374 prototype strain 3880 ranged from 96 to 97% (Table 4). Maximum likelihood phylogenetic  
375 analysis indicated that the new viral genomes cluster together with historical Panamanian VEEV  
376 ID subtype strains within the Panama/Peru genotype (bootstrap statistical support =100; Figure  
377 4). Percentage of genome identity with VEEV reference strain ranged from 45% to 100% (Table  
378 4).

379

### 380 **Discussion**

381 The VEEV complex, MADV and EEEV viruses have been detected throughout the Americas  
382 and may account for a significant proportion of non-dengue acute febrile illness (2, 3, 5, 9).

383 Although several assays have been developed for the molecular detection of VEEV subtypes and  
384 VEEV complex (14–20), many are laborious and time-consuming based in multiple PCR rounds  
385 or posterior genome sequencing that can be only implemented in laboratories with appropriate  
386 facilities (14–20). Co-circulation and the potential for co-infection with these viruses further  
387 complicates their detection, particularly when they present similar clinical presentations and

388 there is a lack of available and convenient methods for detection of VEEV complex viruses and  
389 MADV (19). For example, VEEV subtype ID and MADV have both been identified in Panamá,  
390 and co-circulation of VEEV and MADV was detected in the Darién province of Panamá along  
391 the Colombian border (5–7). Typically, cases are often detected during the neurological phase of  
392 the disease (5, 35). At this stage, the virus has been cleared from the serum and diagnosis relies  
393 mostly on serological testing. Because alphaviruses can induce an IgM response that lasts up to 2  
394 to 3 months, the detection of anti-VEEV or anti-MADV IgM alone could yield a misdiagnosis if  
395 seroconversion is not observed (5, 35).

396 We developed new accurate VEEV complex singleplex and MADV/EEEV duplex rRT-PCRs for  
397 the detection of viral RNA and real-time differentiation of clinical and mosquito samples. Using  
398 these assays, we detected VEEV ID subtype and MADV in samples that had tested negative with  
399 a reference RT-PCR (19). We were also able to identify an individual with a VEEV ID subtype -  
400 MADV co-infection, highlighting another advantage of our VEEV complex and MADV/EEEV  
401 rRT-PCRs over previous methods. Co-infection cases are epidemiologically significant and may  
402 have clinical relevance if associated with more severe disease (5). Our newly developed rRT-  
403 PCR assays can be rapidly incorporated into diagnostic algorithms in endemic regions. We show  
404 that the currently developed rRT-PCR allowed us to detect VEEV ID subtype RNA in samples  
405 collected from patients at least within the first 5 days of symptoms, whereas alphavirus IgM and  
406 IgG antibody responses usually develop >5–7 days post symptom onset (36). Interestingly, three  
407 patients with detectable VEEV complex RNA were also VEEV IgM and IgG-reactive,  
408 suggesting that VEEV re-infections are possible, a finding with potential implications for  
409 alphavirus vaccine development.

410 Our newly developed rRT-PCR allows the detection of the recently identified VEEV ID subtype  
411 in acute infections. Our results of prospective disease surveillance in Panama indicate that 11.9%  
412 of suspected dengue cases are VEEV ID subtype infections and provide evidence for overlapping  
413 alphavirus circulation with other endemic arboviral infections such as dengue. Moreover, our  
414 findings support previous evidence suggesting that VEEV complex infections represent 10 % of  
415 the dengue burden in Latin American endemic countries(2). VEEV complex infections are  
416 clinically undistinguished from endemic infections such as dengue (2), thus the VEEV complex  
417 burden may be underestimated in dengue endemic regions.

418 VEEV ID subtype RNA was detected in three mosquito pools from the *Cx. (Mel.) vomerifer*  
419 species trapped during the 2015 outbreak in El Real de Santamaria, Panama. Mosquitoes, from  
420 the *Cx. (Mel.) vomerifer* have been previously incriminated as a vector for VEEV ID subtype in  
421 Panama (2). Two of these mosquito pools yielded viral isolates. None of the original pan-  
422 alphavirus convectional RT-PCRs were able to detect viral RNA in the mosquito pools. This  
423 suggests that our newly designed rRT-PCR has an increased sensitivity to detect VEEV complex  
424 RNA in mosquito vectors. No MADV nor EEEV infections were detected in mosquitoes by  
425 either pan-alpha, rRT-PCR or isolation methods. The same pattern of lack of MADV isolation or  
426 detection in mosquitoes was observed during previous outbreak investigations undertaken by our  
427 group in Panama (37, 38). Interestingly, low MADV frequency of isolation was also observed  
428 during extensive mosquito investigations undertaken during the 1940-60s in Panama by the  
429 Gorgas Memorial Laboratory; in these occasions MADV was only isolated twice from *Cx. (Mel.)*  
430 *taeniopus* in 1964 and 1973, respectively (39, 40). The low frequency of MADV detection or  
431 isolation in Panama contrast with features observed in the endemic region of Iquitos, Peru, where  
432 active circulation of MADV in the enzootic vector *Culex (Mel.) pedroi* is frequently detected(9,

433 41). Taken together, the early reports along with recent evidence suggest that mosquito vectors  
434 in Panama may be infected with MADV at a lower frequency when compared with VEEV ID  
435 subtype and even MADV in other endemic regions. The reasons for this variation in MADV and  
436 VEEV ID subtype frequency of isolation or detection from mosquitoes collected in Panama  
437 remain unclear and may include variation in vector competence or viral heterologous  
438 competition or even enhanced VEEV ID subtype transmission by insect specific virus as has  
439 been shown with dengue and Zika viruses (42).

440 Only a small number of human and mosquito samples were available to validate the assays.  
441 However, prospective disease surveillance allowed us to obtain additional samples to further  
442 validate our new assays. While previously developed methods relied on the validation of assays  
443 using plasmids, viral isolates, or a few human sera samples (13–21), our assay validation with  
444 human sera, mosquitos, and post-mortem tissue samples is more realistic and typical in reference  
445 laboratories. Moreover, our approach failed to detect two samples that had previously tested  
446 positive back in 2015 using standard alphavirus generic primers (19). Vina-Rodriguez et al.,  
447 reported an rRT-PCR that was designed from an alignment of 33 VEEV sequences (21).  
448 Development of this assay did not include other species that comprise the VEEV complex, and  
449 clinical samples were not available for evaluation (21). Our assays were designed using a greater  
450 number of complete genome sequences with confirmation *in silico* that the primers and probes  
451 match contemporary alignments. Interestingly, a second round of the generic alphavirus RT-PCR  
452 undertaken in 2017 with the same primers have also failed to reamplify the former positives.  
453 Viral RNA degradation over time is a likely explanation of these false negative samples(43).  
454 Untargeted metagenomic sequencing of complete and near-complete genome sequences  
455 confirmed that the VEEV ID subtype was detected using the VEEV complex primers; this

456 subtype has been detected in central and eastern Panama regions (7). Further VEEV ID subtype  
457 evolutionary analyses are currently being undertaken to investigate host or vector adaptations.  
458 Taken together, these data demonstrate the potential of molecular and genomic approaches to  
459 improve the detection of VEE complex, MADV and EEEV acute infections, even in long-time  
460 storage samples.

461 Additional prospective testing is warranted to fully characterize the assays' clinical and  
462 surveillance performance. An additional limitation of this study is that the design requires two  
463 separate assays for three viruses as the optimal design targets for the VEEV complex and MADV  
464 overlap in a highly conserved region. However, the two rRT-PCRs can be performed together on  
465 a single run, however, which improves lab workflow, and the VEEV complex assay can be  
466 multiplexed with rRT-PCRs for other neurotropic arboviruses such as West Nile and St. Louis  
467 encephalitis viruses without a loss in performance (manuscript in preparation).

468 In conclusion, we describe new sensitive and specific VEEV complex, MADV and EEEV rRT-  
469 PCRs that provide significant benefits over available molecular methods, allowing us to detect  
470 VEEV-MADV co-infections and VEEV human infection in samples that were negative with  
471 other techniques. Early acute samples that were negative with other techniques. Early acute  
472 samples ( $\leq 3$  days since onset of symptoms), with coincidental VEEV specific antibodies and  
473 VEEV viral RNA suggest that VEEV re-infections are possible. In addition, our newly  
474 developed method allowed us to detect VEEV active viral circulation in mosquitoes collected  
475 during an alphavirus outbreak response. The implementation of then assays in regions of  
476 endemicity may improve the identification and characterization of these neurotropic  
477 alphaviruses.

478

479

480

## 481 **Acknowledgements**

482 We thank Xacdiel Rodriguez, Yelissa Rios, Yaneth Pittí, Oriel Lezcano and Eddier Rivera and  
483 Mileika Santos for technical support with sample processing and mosquito classification and  
484 Alberto Cumbreira for the map construction. We also thank Leyda Abrego for providing reagents  
485 for the rRT-PCR and Milena Gomez, Thais M. Coletti, Esmenia Rocha, Geovana Maria Pererira,  
486 Erika R. Manuli for technical support with metagenomic sequencing

487

## 488 **Funding Sources**

489 JPC is funded by the Clarendon Scholarship from University of Oxford and Lincoln-Kingsgate  
490 Scholarship from Lincoln College, University of Oxford (grant number  
491 SFF1920\_CB2\_MPLS\_1293647). This work was supported by SENACYT, through the grants  
492 number FID-16-201 and FID-2021-96 grant to JPC; the National Institute of Allergy and  
493 Infectious Diseases, National Institutes of Health (grant K08AI110528 to JJW) and the National  
494 Institute of Allergy and Infectious Diseases, National Institutes of Health (grant K08AI110528 to  
495 JJW) and Centers for Research in Emerging Infectious Diseases (CREID) Coordinating  
496 **Research on Emerging Arboviral Threats Encompassing the Neotropics (CREATE-NEO)**  
497 1U01AI151807 grant awarded to NV/KAH by the National Institutes of Health (NIH); and by  
498 the Medical Research Council □ São Paulo Research Foundation CADDE partnership award  
499 (MR/S0195/1 and FAPESP18/14389 □ 0 to NRF) (<https://caddecentre.org>). CAD was supported  
500 by the NIHR HPRU in Emerging and Zoonotic Infections, a partnership between PHE,

501 University of Oxford, University of Liverpool and Liverpool School of Tropical Medicine (grant  
502 no. NIHR200907).

## 503 **References**

- 504 1. Navarro JC, Carrera JP, Liria J, Auguste AJ, Weaver SC. 2017. Alphaviruses in Latin  
505 America and the introduction of chikungunya virus Human Virology in Latin America:  
506 From Biology to Control.
- 507 2. Aguilar P v., Estrada-Franco JG, Navarro-Lopez R, Ferro C, Haddow AD, Weaver SC.  
508 2011. Endemic Venezuelan equine encephalitis in the Americas: Hidden under the dengue  
509 umbrella. *Future Virol* <https://doi.org/10.2217/fvl.11.50>.
- 510 3. Arrigo NC, Adams AP, Weaver SC. 2010. Evolutionary Patterns of Eastern Equine  
511 Encephalitis Virus in North versus South America Suggest Ecological Differences and  
512 Taxonomic Revision. *J Virol* <https://doi.org/10.1128/jvi.01586-09>.
- 513 4. Forshey BM, Guevara C, Laguna-Torres VA, Cespedes M, Vargas J, Gianella A, Vallejo  
514 E, Madrid C, Aguayo N, Gotuzzo E, Suarez V, Morales AM, Beingolea L, Reyes N, Perez  
515 J, Negrete M, Rocha C, Morrison AC, Russell KL, Blair PJ, Olson JG, Kochel TJ. 2010.  
516 Arboviral etiologies of acute febrile illnesses in western south America, 2000-2007. *PLoS*  
517 *Negl Trop Dis* 4.
- 518 5. Carrera J-P, Forrester N, Wang E, Vittor AY, Haddow AD, López-Vergès S, Abadía I,  
519 Castaño E, Sosa N, Báez C, Estripeaut D, Díaz Y, Beltrán D, Cisneros J, Cedeño HG,  
520 Travassos da Rosa AP, Hernandez H, Martínez-Torres AO, Tesh RB, Weaver SC. 2013.  
521 Eastern Equine Encephalitis in Latin America. *New England Journal of Medicine*  
522 <https://doi.org/10.1056/nejmoa1212628>.
- 523 6. Carrera JP, Pittí Y, Molaes-Martínez JC, Casal E, Pereyra-Elias R, Saenz L, Guerrero I,  
524 Galué J, Rodriguez-Alvarez F, Jackman C, Pascale JM, Armien B, Weaver SC, Donnelly  
525 CA, Vittor AY. 2020. Clinical and serological findings of madariaga and venezuelan



- 526 equine encephalitis viral infections: A follow-up study 5 years after an outbreak in  
527 Panama. *Open Forum Infect Dis* <https://doi.org/10.1093/ofid/ofaa359>.
- 528 7. Quiroz E, Aguilar P v., Cisneros J, Tesh RB, Weaver SC. 2009. Venezuelan equine  
529 encephalitis in Panama: Fatal endemic disease and genetic diversity of etiologic viral  
530 strains. *PLoS Negl Trop Dis* <https://doi.org/10.1371/journal.pntd.0000472>.
- 531 8. Corniou B, Ardoin P, Bartholomew C, Ince W, Massiah V. 1972. First isolation of a South  
532 American strain of Eastern Equine virus from a case of encephalitis in Trinidad. *Trop*  
533 *Geogr Med* 24.
- 534 9. Aguilar P v., Robich RM, Turell MJ, O'Guinn ML, Klein TA, Huaman A, Guevara C,  
535 Rios Z, Tesh RB, Watts DM, Olson J, Weaver SC. 2007. Endemic eastern equine  
536 encephalitis in the Amazon region of Peru. *American Journal of Tropical Medicine and*  
537 *Hygiene* <https://doi.org/10.4269/ajtmh.2007.76.293>.
- 538 10. Vittor AY, Armien B, Gonzalez P, Carrera J-P, Dominguez C, Valderrama A, Glass GE,  
539 Beltran D, Cisneros J, Wang E, Castillo A, Moreno B, Weaver SC. 2016. Epidemiology of  
540 Emergent Madariaga Encephalitis in a Region with Endemic Venezuelan Equine  
541 Encephalitis: Initial Host Studies and Human Cross-Sectional Study in Darien, Panama.  
542 *PLoS Negl Trop Dis* 10.
- 543 11. Gil LHVG, Magalhaes T, Santos BSAS, Oliveira L v., Oliveira-Filho EF, Cunha JLR,  
544 Fraiha ALS, Rocha BMM, Longo BC, Ecco R, Faria GC, Furtini R, Drumond SRM,  
545 Maranhão RPA, Lobato ZIP, Guedes MIMC, Teixeira RBC, Costa EA. 2021. Active  
546 circulation of madariaga virus, a member of the eastern equine encephalitis virus complex,  
547 in northeast brazil. *Pathogens* 10.

- 548 12. Lednicky JA, White SK, Mavian CN, el Badry MA, Telisma T, Salemi M, O'Kech BA,  
549 Beau De Rochars VM, Morris JG. 2019. Emergence of Madariaga virus as a cause of  
550 acute febrile illness in children, Haiti, 2015-2016. *PLoS Negl Trop Dis*  
551 <https://doi.org/10.1371/journal.pntd.0006972>.
- 552 13. Pfeffer M, Proebster B, Kinney RM, Kaaden OR. 1997. Genus-specific detection of  
553 alphaviruses by a semi-nested reverse transcription-polymerase chain reaction. *American*  
554 *Journal of Tropical Medicine and Hygiene* 57.
- 555 14. Brightwell G, Brown JM, Coates DM. 1998. Genetic targets for the detection and  
556 identification of Venezuelan equine encephalitis viruses. *Arch Virol* 143.
- 557 15. Romeiro MF, de Souza WM, Tolardo AL, Vieira LC, Henriques DA, de Araujo J,  
558 Siqueira CEH, Colombo TE, Aquino VH, da Fonseca BAL, de Moraes Bronzoni RV,  
559 Nogueira ML, Durigon EL, Figueiredo LTM. 2016. A real-time RT-PCR for rapid  
560 detection and quantification of mosquito-borne alphaviruses. *Arch Virol* 161.
- 561 16. Linssen B, Kinney RM, Aguilar P, Russell KL, Watts DM, Kaaden OR, Pfeffer M. 2000.  
562 Development of reverse transcription-PCR assays specific for detection of equine  
563 encephalitis viruses. *J Clin Microbiol* 38.
- 564 17. Wang E, Paessler S, Aguilar P v., Carrara AS, Ni K, Greene IP, Weaver SC. 2006.  
565 Reverse transcription-PCR-enzyme-linked immunosorbent assay for rapid detection and  
566 differentiation of alphavirus infections. *J Clin Microbiol* 44.
- 567 18. Pisano MB, Seco MPS, Ré VE, Farías AA, Contigiani MS, Tenorio A. 2012. Specific  
568 detection of all members of the Venezuelan Equine Encephalitis complex: Development  
569 of a RT-Nested PCR. *J Virol Methods* 186.

- 570 19. Sánchez-Seco MP, Rosario D, Quiroz E, Guzmán G, Tenorio A. 2001. A generic nested-  
571 RT-PCR followed by sequencing for detection and identification of members of the  
572 alphavirus genus. *J Virol Methods* [https://doi.org/10.1016/S0166-0934\(01\)00306-8](https://doi.org/10.1016/S0166-0934(01)00306-8).
- 573 20. Bronzoni RVM, Moreli ML, Cruz ACR, Figueiredo LTM. 2004. Multiplex nested PCR  
574 for Brazilian Alphavirus diagnosis. *Trans R Soc Trop Med Hyg* 98.
- 575 21. Vina-Rodriguez A, Eiden M, Keller M, Hinrichs W, Groschup MH. 2016. A quantitative  
576 real-time RT-PCR assay for the detection of venezuelan equine encephalitis virus utilizing  
577 a universal alphavirus control RNA. *Biomed Res Int* 2016.
- 578 22. Benson DA, Cavanaugh M, Clark K, Karsch-Mizrachi I, Ostell J, Pruitt KD, Sayers EW.  
579 2018. GenBank. *Nucleic Acids Res* <https://doi.org/10.1093/nar/gkx1094>.
- 580 23. Rojas A, Cardozo F, Cantero C, Stittleburg V, López S, Bernal C, Gimenez Acosta FE,  
581 Mendoza L, Pinsky BA, de Guillén IA, Páez M, Waggoner J. 2019. Characterization of  
582 dengue cases among patients with an acute illness, Central Department, Paraguay. *PeerJ*  
583 2019.
- 584 24. Claudino-Sales V. 2019. Darien National Park, PanamaCoastal Research Library.
- 585 25. Santiago GA, Vázquez J, Courtney S, Matías KY, Andersen LE, Colón C, Butler AE,  
586 Roulo R, Bowzard J, Villanueva JM, Muñoz-Jordan JL. 2018. Performance of the  
587 Trioplex real-time RT-PCR assay for detection of Zika, dengue, and chikungunya viruses.  
588 *Nat Commun* 9.
- 589 26. Sallum MAM, Forattini OP. 1996. Revision of the spissipes section of culex  
590 (melanoconion) (diptera: Culicidae). *J Am Mosq Control Assoc*.
- 591 27. Johnson BW, Kosoy O, Wang E, Delorey M, Russell B, Bowen RA, Weaver SC. 2011.  
592 Use of Sindbis/eastern equine encephalitis chimeric viruses in plaque reduction

- 593 neutralization tests for arboviral disease diagnostics. *Clinical and Vaccine Immunology*  
594 18.
- 595 28. Claro IM, Ramundo MS, Coletti TM, da Silva CAM, Valenca IN, Candido DS, Sales  
596 FCS, Manuli ER, de Jesus JG, de Paula A, Felix AC, Andrade P dos S, Pinho MC, Souza  
597 WM, Amorim MR, Proenca-Modena JL, Kallas EG, Levi JE, Faria NR, Sabino EC,  
598 Loman NJ, Quick J. 2021. Rapid viral metagenomics using SMART-9N amplification and  
599 nanopore sequencing. *Wellcome Open Res* 6.
- 600 29. Li H. 2018. Minimap2: Pairwise alignment for nucleotide sequences. *Bioinformatics* 34.
- 601 30. Li H, Handsaker B, Wysoker A, Fennell T, Ruan J, Homer N, Marth G, Abecasis G,  
602 Durbin R. 2009. The Sequence Alignment/Map format and SAMtools. *Bioinformatics* 25.
- 603 31. Oxford Nanopore. 2022. GitHub Create statistic summary of an Oxford Nanopore read  
604 dataset.
- 605 32. Milne I, Stephen G, Bayer M, Cock PJA, Pritchard L, Cardle L, Shawand PD, Marshall D.  
606 2013. Using tablet for visual exploration of second-generation sequencing data. *Brief*  
607 *Bioinform* 14.
- 608 33. Katoh K, Standley DM. 2013. MAFFT multiple sequence alignment software version 7:  
609 Improvements in performance and usability. *Mol Biol Evol* 30.
- 610 34. Minh BQ, Schmidt HA, Chernomor O, Schrempf D, Woodhams MD, von Haeseler A,  
611 Lanfear R, Teeling E. 2020. IQ-TREE 2: New Models and Efficient Methods for  
612 Phylogenetic Inference in the Genomic Era. *Mol Biol Evol* 37.
- 613 35. Luciani K, Abadía I, Martínez-Torres AO, Cisneros J, Guerra I, García M, Estripeaut D,  
614 Carrera JP. 2015. Case report: Madariaga virus infection associated with a case of acute  
615 disseminated encephalomyelitis. *American Journal of Tropical Medicine and Hygiene* 92.

- 616 36. Torres-ruesta A, Chee RSL, Ng LFP. 2021. Insights into antibody-mediated alphavirus  
617 immunity and vaccine development landscape. *Microorganisms*  
618 <https://doi.org/10.3390/microorganisms9050899>.
- 619 37. Torres R, Samudio R, Carrera JP, Young J, Maârquez R, Hurtado L, Weaver S, Chaves  
620 LF, Tesh R, Caâceres L. 2017. Enzootic mosquito vector species at equine encephalitis  
621 transmission foci in the República de Panama. *PLoS One*  
622 <https://doi.org/10.1371/journal.pone.0185491>.
- 623 38. Carrera J-P, Cucunuba ZM, Neira K, Lambert B, Pitti Y, Liscano J, Garzon JL, Beltran D,  
624 Collado-Mariscal L, Saenz L, Sosa N, Rodriguez-Guzman LD, Gonzalez P, Lezcano  
625 AGAG, Pereyra-Elias R, Valderrama A, Weaver SC, Vittor AY, Armien B, Pascale J-M,  
626 Donnelly CA. 2020. Endemic and epidemic human alphavirus infections in eastern  
627 Panama: An analysis of population-based cross-sectional surveys. *American Journal of*  
628 *Tropical Medicine and Hygiene* 10:901462.
- 629 39. Dietz WH, Galindo P, Johnson KM. 1980. Eastern equine encephalomyelitis in Panama:  
630 The epidemiology of the 1973 epizootic. *American Journal of Tropical Medicine and*  
631 *Hygiene* <https://doi.org/10.4269/ajtmh.1980.29.133>.
- 632 40. Srihongse S, Galindo P. 1967. The isolation of eastern equine encephalitis virus from  
633 *Culex (Melanoconion) taeniopus* Dyar and Knab in Panama. *Mosquito News* 27:74–76.
- 634 41. Turell MJ, O’Guinn ML, Jones JW, Sardelis MR, Dohm DJ, Watts DM, Fernandez R,  
635 Travassos Da Rosa A, Guzman H, Tesh R, Rossi CA, Ludwig G v., Mangiafico JA,  
636 Kondig J, Wasieloski LP, Pecor J, Zyzak M, Schoeler G, Mores CN, Calampa C, Lee JS,  
637 Klein TA, 2006. Isolation of Viruses from Mosquitoes (Diptera: Culicidae) Collected in  
638 the Amazon Basin Region of Peru. *J Med Entomol* 42:891–898.

- 639 42. Olmo RP, Todjro YMH, Aguiar ERGR, de Almeida JPP, Ferreira F v., Armache JN, de  
640 Faria IJS, Ferreira AGA, Amadou SCG, Silva ATS, de Souza KPR, Vilela APP, Babarit  
641 A, Tan CH, Diallo M, Gaye A, Paupy C, Obame-Nkoghe J, Visser TM, Koenraad CJM,  
642 Wongsokarijo MA, Cruz ALC, Prieto MT, Parra MCP, Nogueira ML, Avelino-Silva V,  
643 Mota RN, Borges MAZ, Drumond BP, Kroon EG, Recker M, Sedda L, Marois E, Imler  
644 JL, Marques JT. 2023. Mosquito vector competence for dengue is modulated by insect-  
645 specific viruses. *Nat Microbiol* 8:135–149.
- 646 43. Relova D, Rios L, Acevedo AM, Coronado L, Perera CL, Pérez LJ. 2018. Impact of RNA  
647 degradation on viral diagnosis: An understated but essential step for the successful  
648 establishment of a diagnosis network. *Vet Sci* 5.
- 649  
650  
651  
652  
653  
654  
655  
656  
657  
658  
659  
660  
661  
662  
663  
664  
665  
666  
667  
668  
669  
670  
671  
672  
673

674 **Tables**

675

676 **Table 1.** Primers and probes in the VEEV and MADV/EEEV rRT-PCRs.

677

| Name             | Sequence <sup>a</sup>                    | Concentration (nM)<br><sup>b</sup> | Location (5'-3') <sup>c</sup> | Sequences Fully<br>Matching <sup>d</sup> |
|------------------|------------------------------------------|------------------------------------|-------------------------------|------------------------------------------|
| <i>VEEV</i>      |                                          |                                    |                               |                                          |
| VEEV Forward 1   | GAAAGTTCACGTT                            | 200                                | 44-67                         | 156/159 (98)                             |
|                  | GAYATCGAGGA                              |                                    |                               |                                          |
| VEEV Forward 2   | GAAGGTTTCACGTT                           | 200                                |                               |                                          |
|                  | GAYATCGAGGA                              |                                    |                               |                                          |
| VEEV Reverse 1   | GCTCTGGCRRTTAG                           | 200                                | 144-163                       | 159/159 (100)                            |
|                  | CATGGTC                                  |                                    |                               |                                          |
| VEEV Reverse 2   | GCTCTAGCRRTTAG                           | 200                                |                               |                                          |
|                  | CATGGTC                                  |                                    |                               |                                          |
| VEEV Probe       | 5'-FAM-                                  | 400                                | 112-134                       | 158/159 (99)                             |
|                  | TTGAGGTAGAAGC<br>HAAGCAGGTC-<br>BHQ-1-3' |                                    |                               |                                          |
| <i>MADV/EEEV</i> |                                          |                                    |                               |                                          |
| ME Forward       | GAGATAGAAGCM                             | 400                                | 121-141; 99-119               | 31/32 (97); 1/449<br>(100)               |
|                  | ACGCAGGTC                                |                                    |                               |                                          |
| ME Reverse       | TGYTTGGAATGCG                            | 400                                | 255-272; 233-250              | 32/32 (100); 9/449<br>(98)               |
|                  | TGTGC                                    |                                    |                               |                                          |
| MADV Probe       | 5'-FAM-                                  | 200                                | 195-214                       | 31/32 (97)                               |
|                  | CATCGAAAGCGAA<br>GTGGACC-BHQ-1-<br>3'    |                                    |                               |                                          |
| EEEV Probe       | 5'-CFO560-                               | 400                                | 176-198                       | 6/449 (99)                               |
|                  | TGAGGGAGAAGT<br>GGAYACAGACC-             |                                    |                               |                                          |

BHQ-1-3'

---

678

679 Abbreviations: BHQ, black hole quencher; CFO560, CAL Fluor Orange 560; FAM, Fluorescein

680 <sup>a</sup> probe sequences listed 5'-fluorophore-sequence-quencher-3'

681 <sup>b</sup> Concentration in the final reaction mixture

682 <sup>c</sup> Location in the following complete genome sequences: VEEV strain VEEV/Homo sapiens/GTM/69Z1/1969/IAB

683 (Accession number KC344505.2); MADV strain Homo sapiens/Haiti-1901/2016 (MH359233.1); EEEV strain

684 EEEV/Culiseta melanura/USA/SL13-0764-C/2013 (Accession number KX029319.1)

685 <sup>d</sup> Displayed as number of complete genome sequences without a mismatch in the primer/probe sequence over all

686 complete genome sequences aligned (%). Genomes downloaded 22 Sept 2021. Data shown for the combination of

687 forward and reverse VEEV primers.



**Table 2. Characteristics and laboratory results of samples used for protocol validation patients and clinical samples and laboratory results.** Acute samples selected from the 2015 and 2017 alphavirus outbreaks in Darien Province.

| Code   | Township | Age*  | Sex | Symptoms onset | Days of symptoms | RT-PCR-Alpha (2015) | RT-PCR-Alpha (2021) | rRT-PCR-VEE | Ct values | IgM-VEEV | IgM-MADV | IgG-VEEV | IgG-MADV | PRNT-VEEV $\phi$ | PRNT-MADV $\phi$ |
|--------|----------|-------|-----|----------------|------------------|---------------------|---------------------|-------------|-----------|----------|----------|----------|----------|------------------|------------------|
| 258384 | El Real  | 0-9   | M   | Aug. 2015      | 0                | pos                 | neg                 | pos         | 29.3      | neg      | neg      | neg      | neg      | <1:20            | <1:20            |
| 267738 | Cemaco   | 0-9   | M   | July 2017      | 3                | neg                 | neg                 | pos         | 37.8      | pos      | neg      | neg      | neg      | <1:20            | <1:20            |
| 267411 | Tucuti   | 0-9   | F   | July 2017      | 5                | neg                 | neg                 | neg         | -         | pos      | neg      | pos      | pos      | 1:40             | 1:40             |
| 258380 | El Real  | 0-9   | F   | Aug. 2015      | 1                | pos                 | neg                 | neg         | -         | neg      | neg      | neg      | neg      | <1:20            | <1:20            |
| 267410 | Yaviza   | 0-9   | F   | July 2017      | 2                | neg                 | neg                 | neg         | -         | pos      | neg      | pos      | neg      | <1:20            | <1:20            |
| 258657 | Yaviza   | 10-19 | M   | Sept. 2015     | 0                | pos                 | neg                 | pos         | 28        | neg      | neg      | neg      | neg      | <1:20            | <1:20            |
| 258535 | Nicanor  | 20-29 | F   | Sept. 2015     | 2                | pos                 | neg                 | neg         | -         | neg      | neg      | neg      | neg      | <1:20            | <1:20            |
| 258401 | La Palma | 20-29 | M   | Aug. 2015      | 2                | pos                 | neg                 | pos         | 29        | neg      | neg      | neg      | neg      | <1:20            | <1:20            |
| 258395 | Metetí   | 30-39 | M   | Aug. 2015      | 2                | neg                 | neg                 | pos         | 37        | pos      | neg      | neg      | neg      | <1:20            | <1:20            |
| 258399 | El Real  | 30-39 | M   | Aug. 2015      | 1                | pos                 | neg                 | pos         | 26        | neg      | neg      | neg      | neg      | <1:20            | <1:20            |
| 258385 | El Real  | 30-39 | M   | Aug. 2015      | 2                | pos                 | neg                 | pos         | 37        | neg      | neg      | neg      | neg      | <1:20            | <1:20            |
| 258398 | El Real  | 30-39 | M   | Aug. 2015      | 0                | pos                 | neg                 | pos         | 27        | neg      | neg      | pos      | neg      | <1:20            | <1:20            |
| 258536 | Metetí   | 30-39 | F   | Sept. 2015     | 2                | pos                 | neg                 | neg         | -         | neg      | neg      | neg      | neg      | <1:20            | <1:20            |
| 258386 | El Real  | 30-39 | M   | Aug. 2015      | 5                | pos                 | neg                 | pos         | 34        | neg      | neg      | neg      | neg      | ND               | ND               |
| 258379 | El Real  | ≥40   | F   | Aug. 2015      | 2                | pos                 | neg                 | pos         | 31        | neg      | neg      | neg      | neg      | <1:20            | <1:20            |

\*Age categories in years

φ Base on PRNT-80

Abbreviations: Ct, cycle threshold; neg, negative; pos, positive, ND=not done.

**Table 3. Mosquito species collected during the 2015 outbreak in El Real de Santa Maria, Panama.**

| Mosquitos species                                     | N    | (%)  | # Pools | VEE-rRT-PCR Positive | MADV-rRT-PCR Positive | Viral solates |
|-------------------------------------------------------|------|------|---------|----------------------|-----------------------|---------------|
| <i>Coquillettidia venezuelensis</i>                   | 490  | 37.5 | 29      | 0                    | 0                     | 0             |
| <i>Culex</i> ( <i>Melanoconion</i> ) <i>vomerifer</i> | 450  | 34.4 | 27      | 3                    | 0                     | 2             |
| <i>Culex</i> ( <i>Melanoconion</i> ) <i>pedroi</i>    | 32   | 2.4  | 4       | 0                    | 0                     | 0             |
| <i>Aedes serratus</i>                                 | 31   | 2.4  | 7       | 0                    | 0                     | 0             |
| <i>Aedes sp.</i>                                      | 30   | 2.3  | 5       | 0                    | 0                     | 0             |
| <i>Culex</i> ( <i>Melanoconion</i> ) <i>sp.</i>       | 30   | 2.3  | 6       | 0                    | 0                     | 0             |
| <i>Culex</i> ( <i>Culex</i> ) <i>interrogator</i>     | 27   | 2.1  | 5       | 0                    | 0                     | 0             |
| <i>Anopheles trianulatus</i>                          | 23   | 1.8  | 2       | 0                    | 0                     | 0             |
| <i>Aedes eupoclamus</i>                               | 14   | 1.1  | 4       | 0                    | 0                     | 0             |
| <i>Culex</i> ( <i>Culex</i> ) <i>nigripalpus</i>      | 14   | 1.1  | 3       | 0                    | 0                     | 0             |
| <i>Culex</i> ( <i>Culex</i> ) <i>sp.</i>              | 14   | 1.0  | 4       | 0                    | 0                     | 0             |
| <i>Culex</i> ( <i>Melanoconion</i> ) <i>atratus</i>   | 14   | 1.0  | 1       | 0                    | 0                     | 0             |
| <i>Culex</i> ( <i>Melanoconion</i> ) <i>adamesi</i>   | 13   | 1.0  | 3       | 0                    | 0                     | 0             |
| Others*                                               | 125  | 9.6  | 50      | 0                    | 0                     | 0             |
| Total                                                 | 1307 | 100  | 150     | 3                    | 0                     | 2             |

Species <1% abundance are listed as Others.

# Numbers of mosquito pools

**Table 4. Metadata and sequencing statistics for selected VEEV complex RNA positive samples.**

| <b>ID</b>     | <b>Collection date</b> | <b>Location</b> | <b>Host species</b>           | <b>%genome coverage 20X</b> | <b>% Nt Identity with genome reference<sup>a</sup></b> | <b>% Identity with strain 3880b</b> |
|---------------|------------------------|-----------------|-------------------------------|-----------------------------|--------------------------------------------------------|-------------------------------------|
| <b>700677</b> | 2015                   | Darien          | <i>Culex (Mel.) vomerifer</i> | 100                         | 89.8                                                   | 92.1                                |
| <b>700680</b> | 2015                   | Darien          | <i>Culex (Mel.) vomerifer</i> | 100                         | 89.8                                                   | 92.2                                |
| <b>700732</b> | 2015                   | Darien          | <i>Culex (Mel.) vomerifer</i> | 100                         | 90                                                     | 92.3                                |
| <b>258379</b> | 2015                   | Darien          | <i>Human</i>                  | 99.9                        | 89.6                                                   | 92                                  |
| <b>258398</b> | 2015                   | Darien          | <i>Human</i>                  | 70                          | 88.7                                                   | 90.7                                |
| <b>258401</b> | 2015                   | Darien          | <i>Human</i>                  | 90.6                        | 87.7                                                   | 90                                  |
| <b>278716</b> | 2022                   | Darien          | <i>Human</i>                  | 45.98                       | 88.1                                                   | 90                                  |

<sup>a</sup>Genbank accession no. NC\_001449.1

<sup>b</sup>Panamanian VEEV ID subtype prototype strain 3880, GenBank accession no. L00930.1  
Nt=Nucleotide.

## Figure legends

**Figure 1. Map with the distribution of VEEV human cases in Darien province in 2015 and 2017 and Health centres in Panama and Darien Provinces. A.** Distribution of VEEV cases used for protocol validation. Red dots represent the number of cases reported by locality. **B.** Distribution of Health centers used for prospective febrile surveillance in Panama and Darien provinces. Map was created with ArcGIS Desktop 10.6 using shapefiles from Esri. Data sources for the shapefiles include Esri, Garmin International Inc., US Central Intelligence Agency, and National Geographic Society (39).

**Figure 2. VEE and MADV/EEEV rRT-PCR linearity and limit of detection. A)**

Amplification curves across the linear range of the VEE complex rRT-PCR with ssDNA (gray curves, subtype IAB) and RNA (pink dotted curves, subtype IC). **B)** Linearity and limit of detection for VEE were evaluated with ssDNA from subtypes IAB (grey) and IV (purple) and RNA from subtype IC (pink). **(C-D)** Linearity and limit of detection for MADV © and EEEV (D) were evaluated using ssDNA. For each virus, ssDNA was tested in quadruplicate at 8.0, 6.0, 4.0, 2.0 and 1.0 log<sub>10</sub> copies/μL (labelled a-e, respectively). 10-fold dilutions of VEEV subtype IC RNA were tested in duplicate starting at the highest concentration available (5.0 log<sub>10</sub> copies/μL). All data points are displayed, including 2/4 MADV and EEEV replicates that did not yield cycle threshold (Ct) values and were excluded from the linear regressions.

**Figure 3. Flowchart of patient recruitment, characteristics and RT-PCR results of febrile patients detected throughout disease surveillance.** Febrile patients were recruited from November 16, 2021, to December 1, 2022, in ten health care centers of Panama and Darien provinces.

**Figure 4. VEEV complex maximum likelihood phylogenetic tree.** Maximum likelihood phylogenetic was estimated using 139 complete or near complete VEEV genomes. Publicly available Panamanian VEEV ID subtype strains are highlighted in grey (n=) and genomes generated in this study (n=7) are highlighted in red. Bootstrap statistical support are shown for selected nodes. NCBI GenBank accessions numbers for the new VEEV genomes are: XX-XX.

**Figure 1. Map with the distribution of VEEV human cases in Darien province in 2015 and 2017 and Health centres in Panama and Darien Provinces.**

medRxiv preprint doi: <https://doi.org/10.1101/2022.04.04.22271864>; this version posted February 27, 2023. The copyright holder for this preprint (which was not certified by peer review) is the author/funder, who has granted medRxiv a license to display the preprint in perpetuity. It is made available under a CC-BY-NC-ND 4.0 International license.

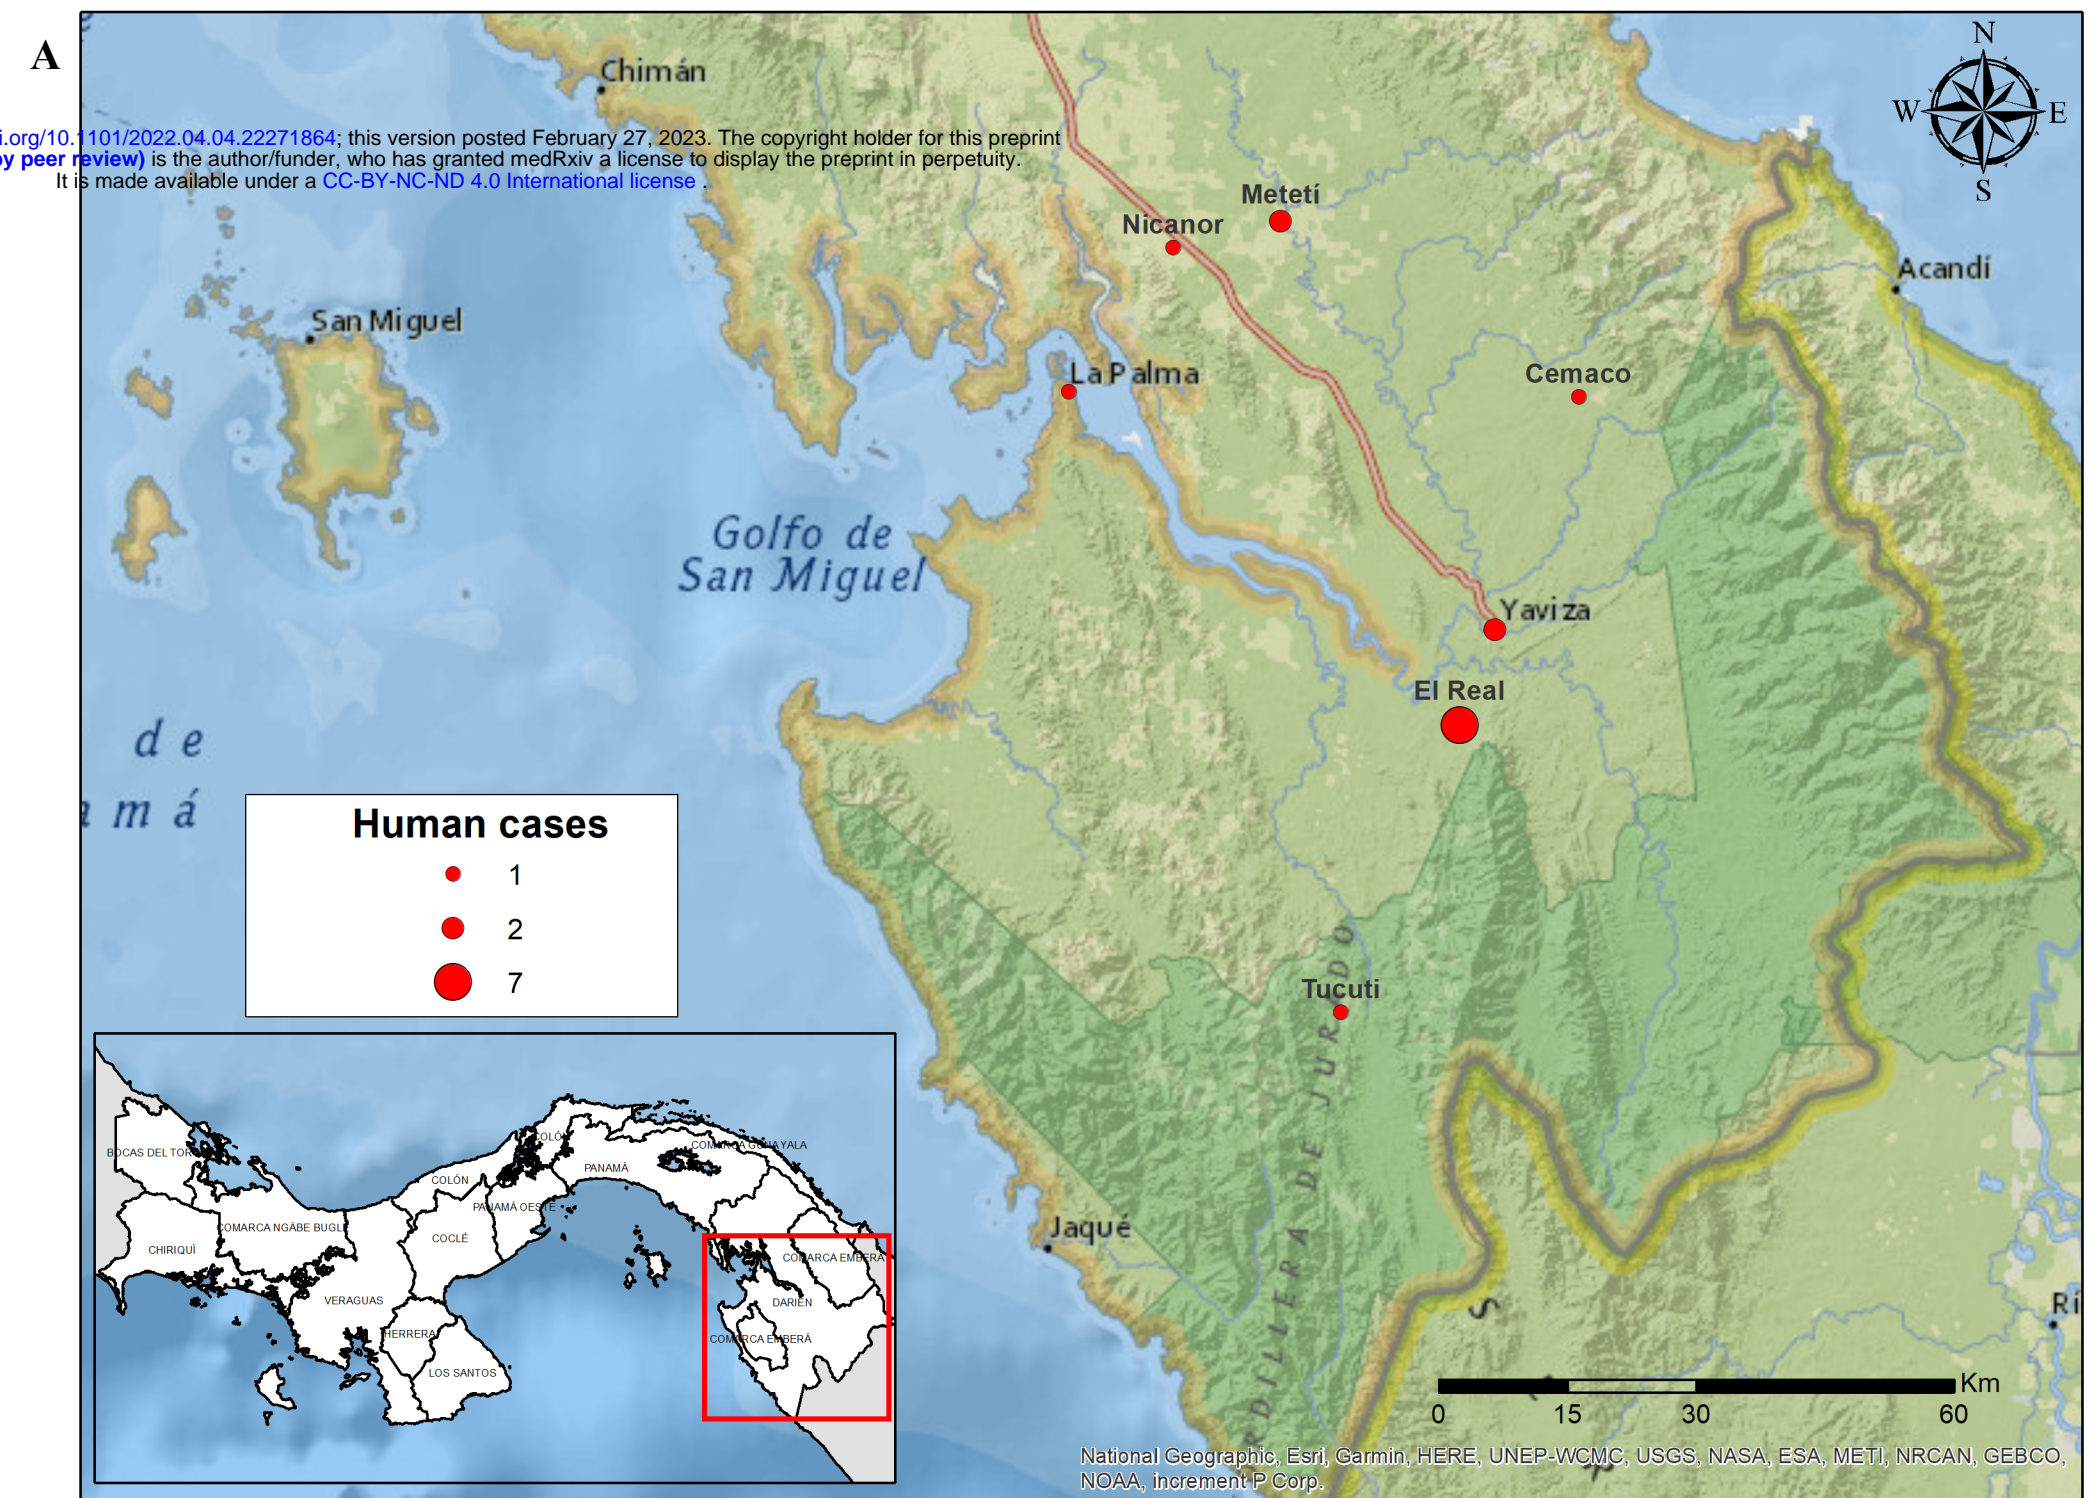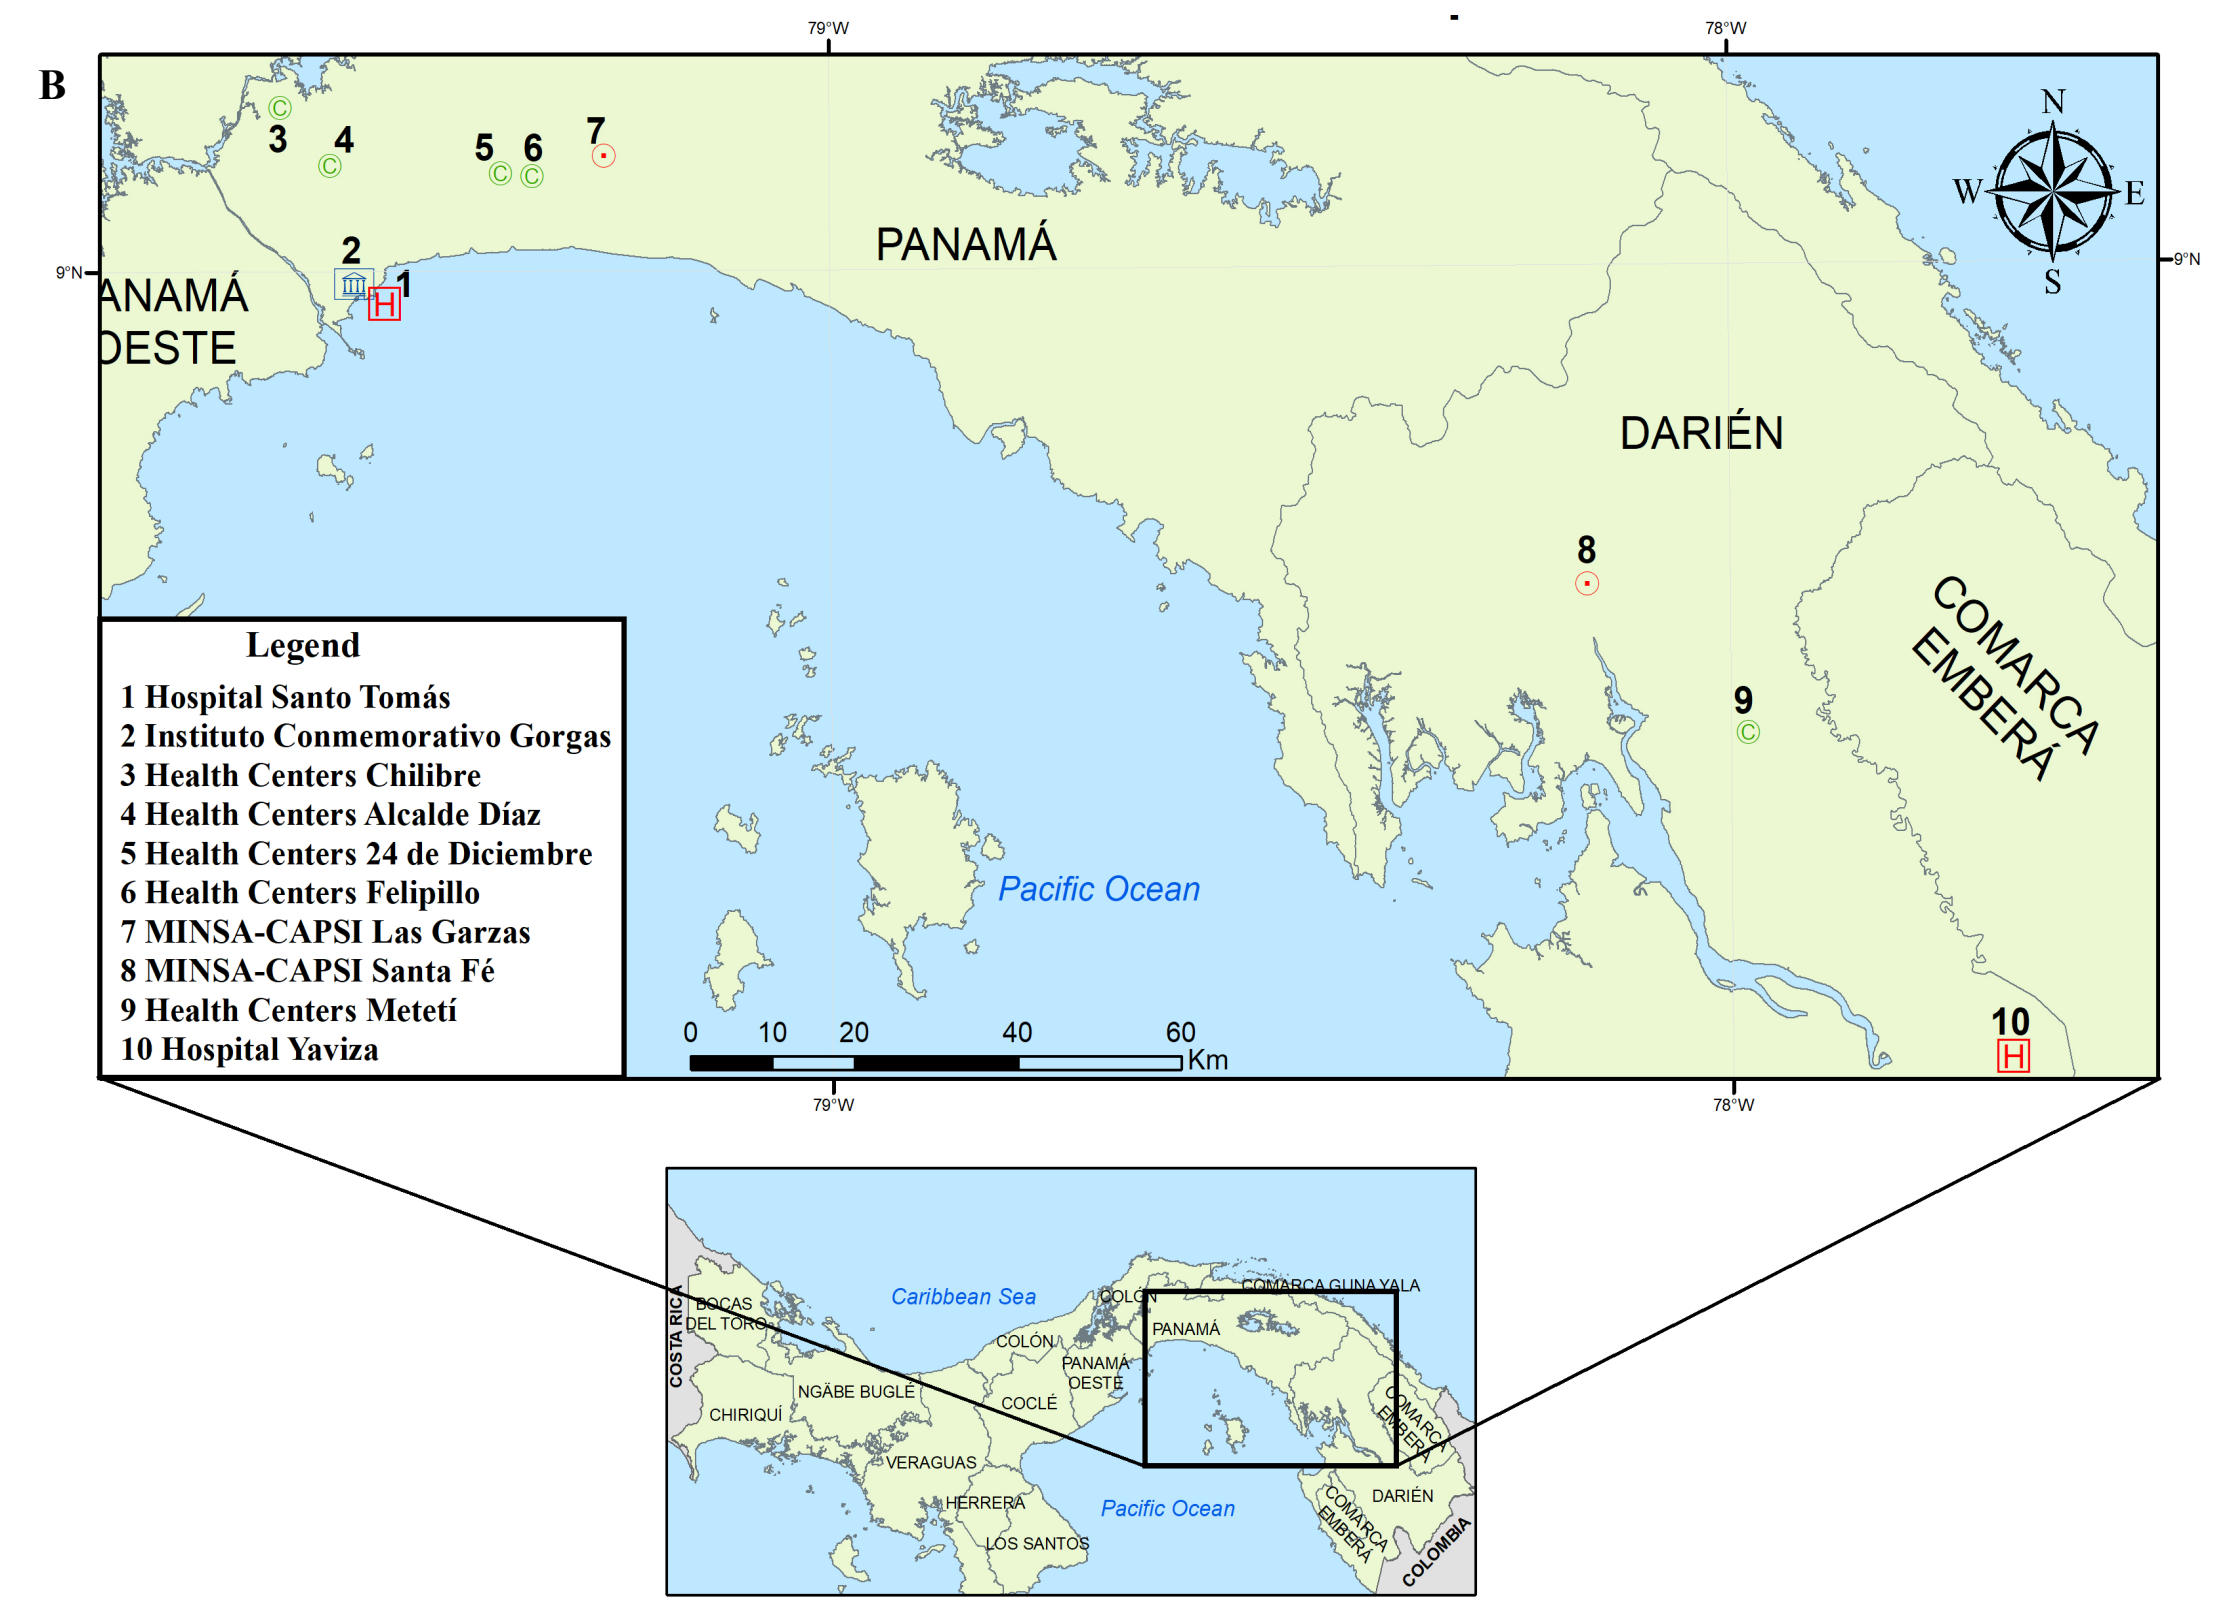

**Figure 2. VEE and MADV/EEEV rRT-PCR linearity and limit of detection.**

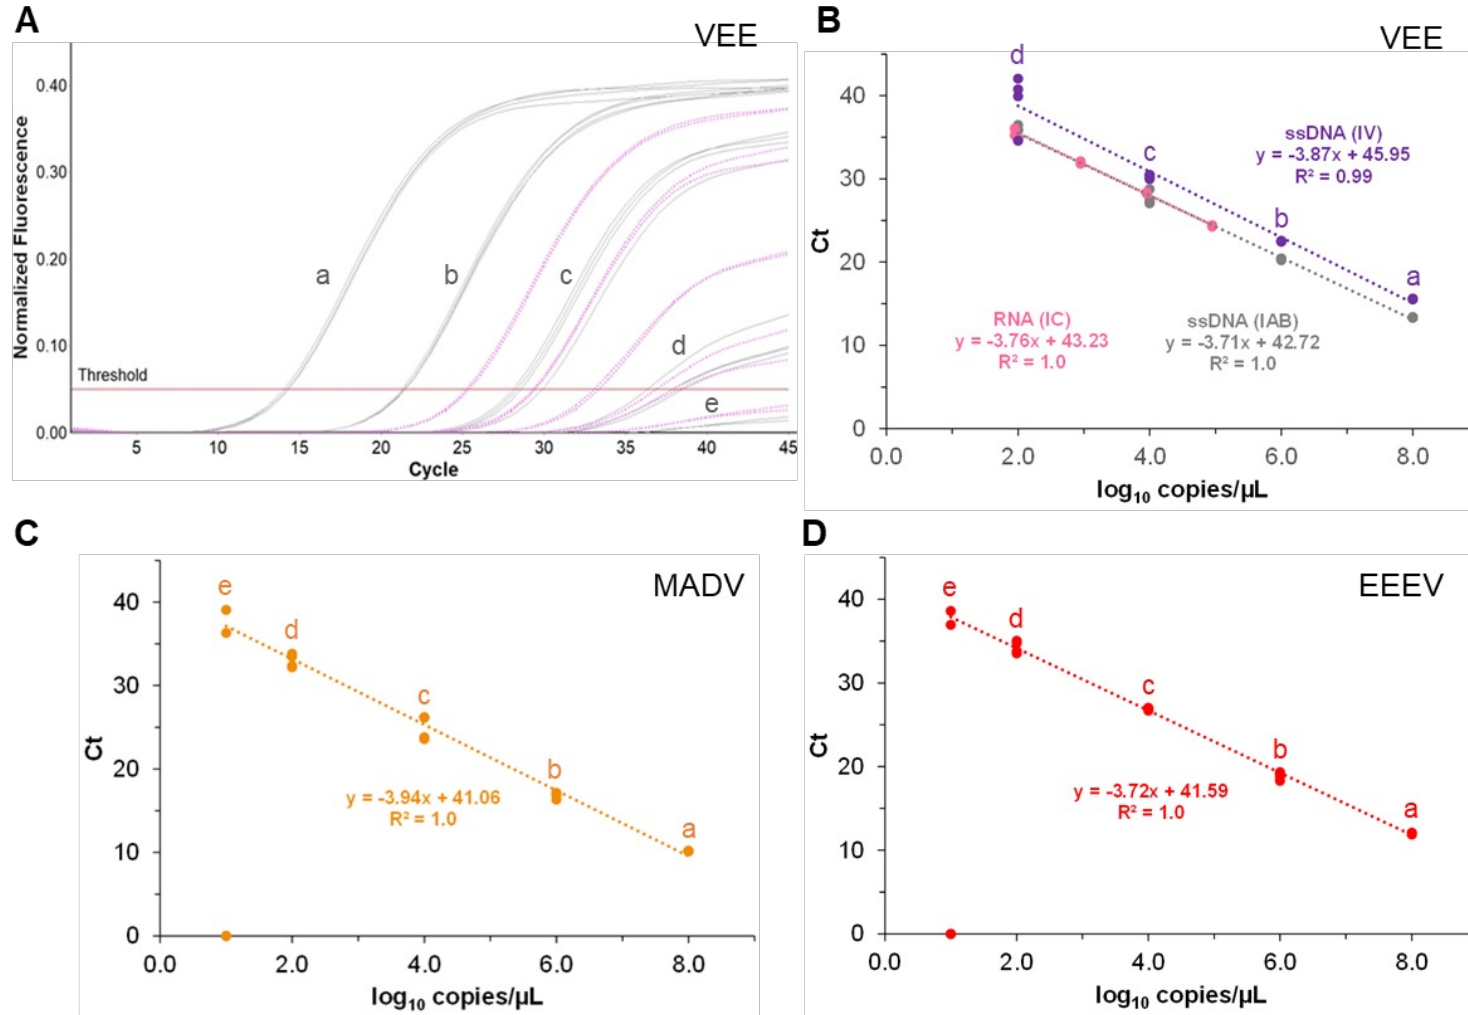

**Figure 3. Flowchart of patient recruitment, characteristics and RT-PCR results of febrile patients detected throughout disease surveillance.**

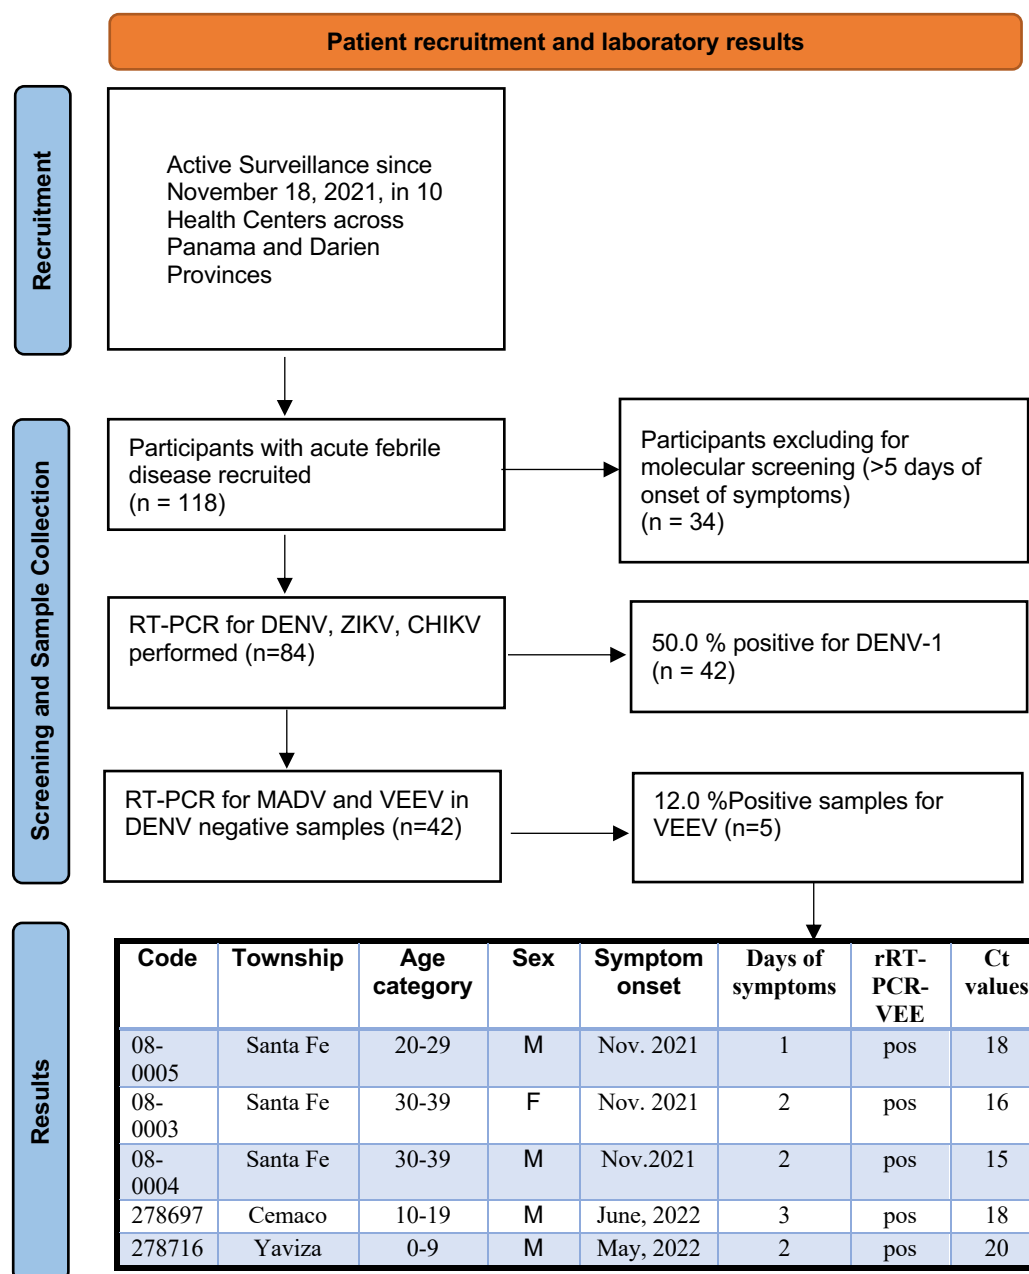



medRxiv preprint doi: <https://doi.org/10.1101/2022.04.04.22271864>; this version posted February 27, 2023. The copyright holder for this preprint (which was not certified by peer review) is the author/funder, who has granted medRxiv a license to display the preprint in perpetuity. It is made available under a [CC-BY-NC-ND 4.0 International license](https://creativecommons.org/licenses/by-nc-nd/4.0/).

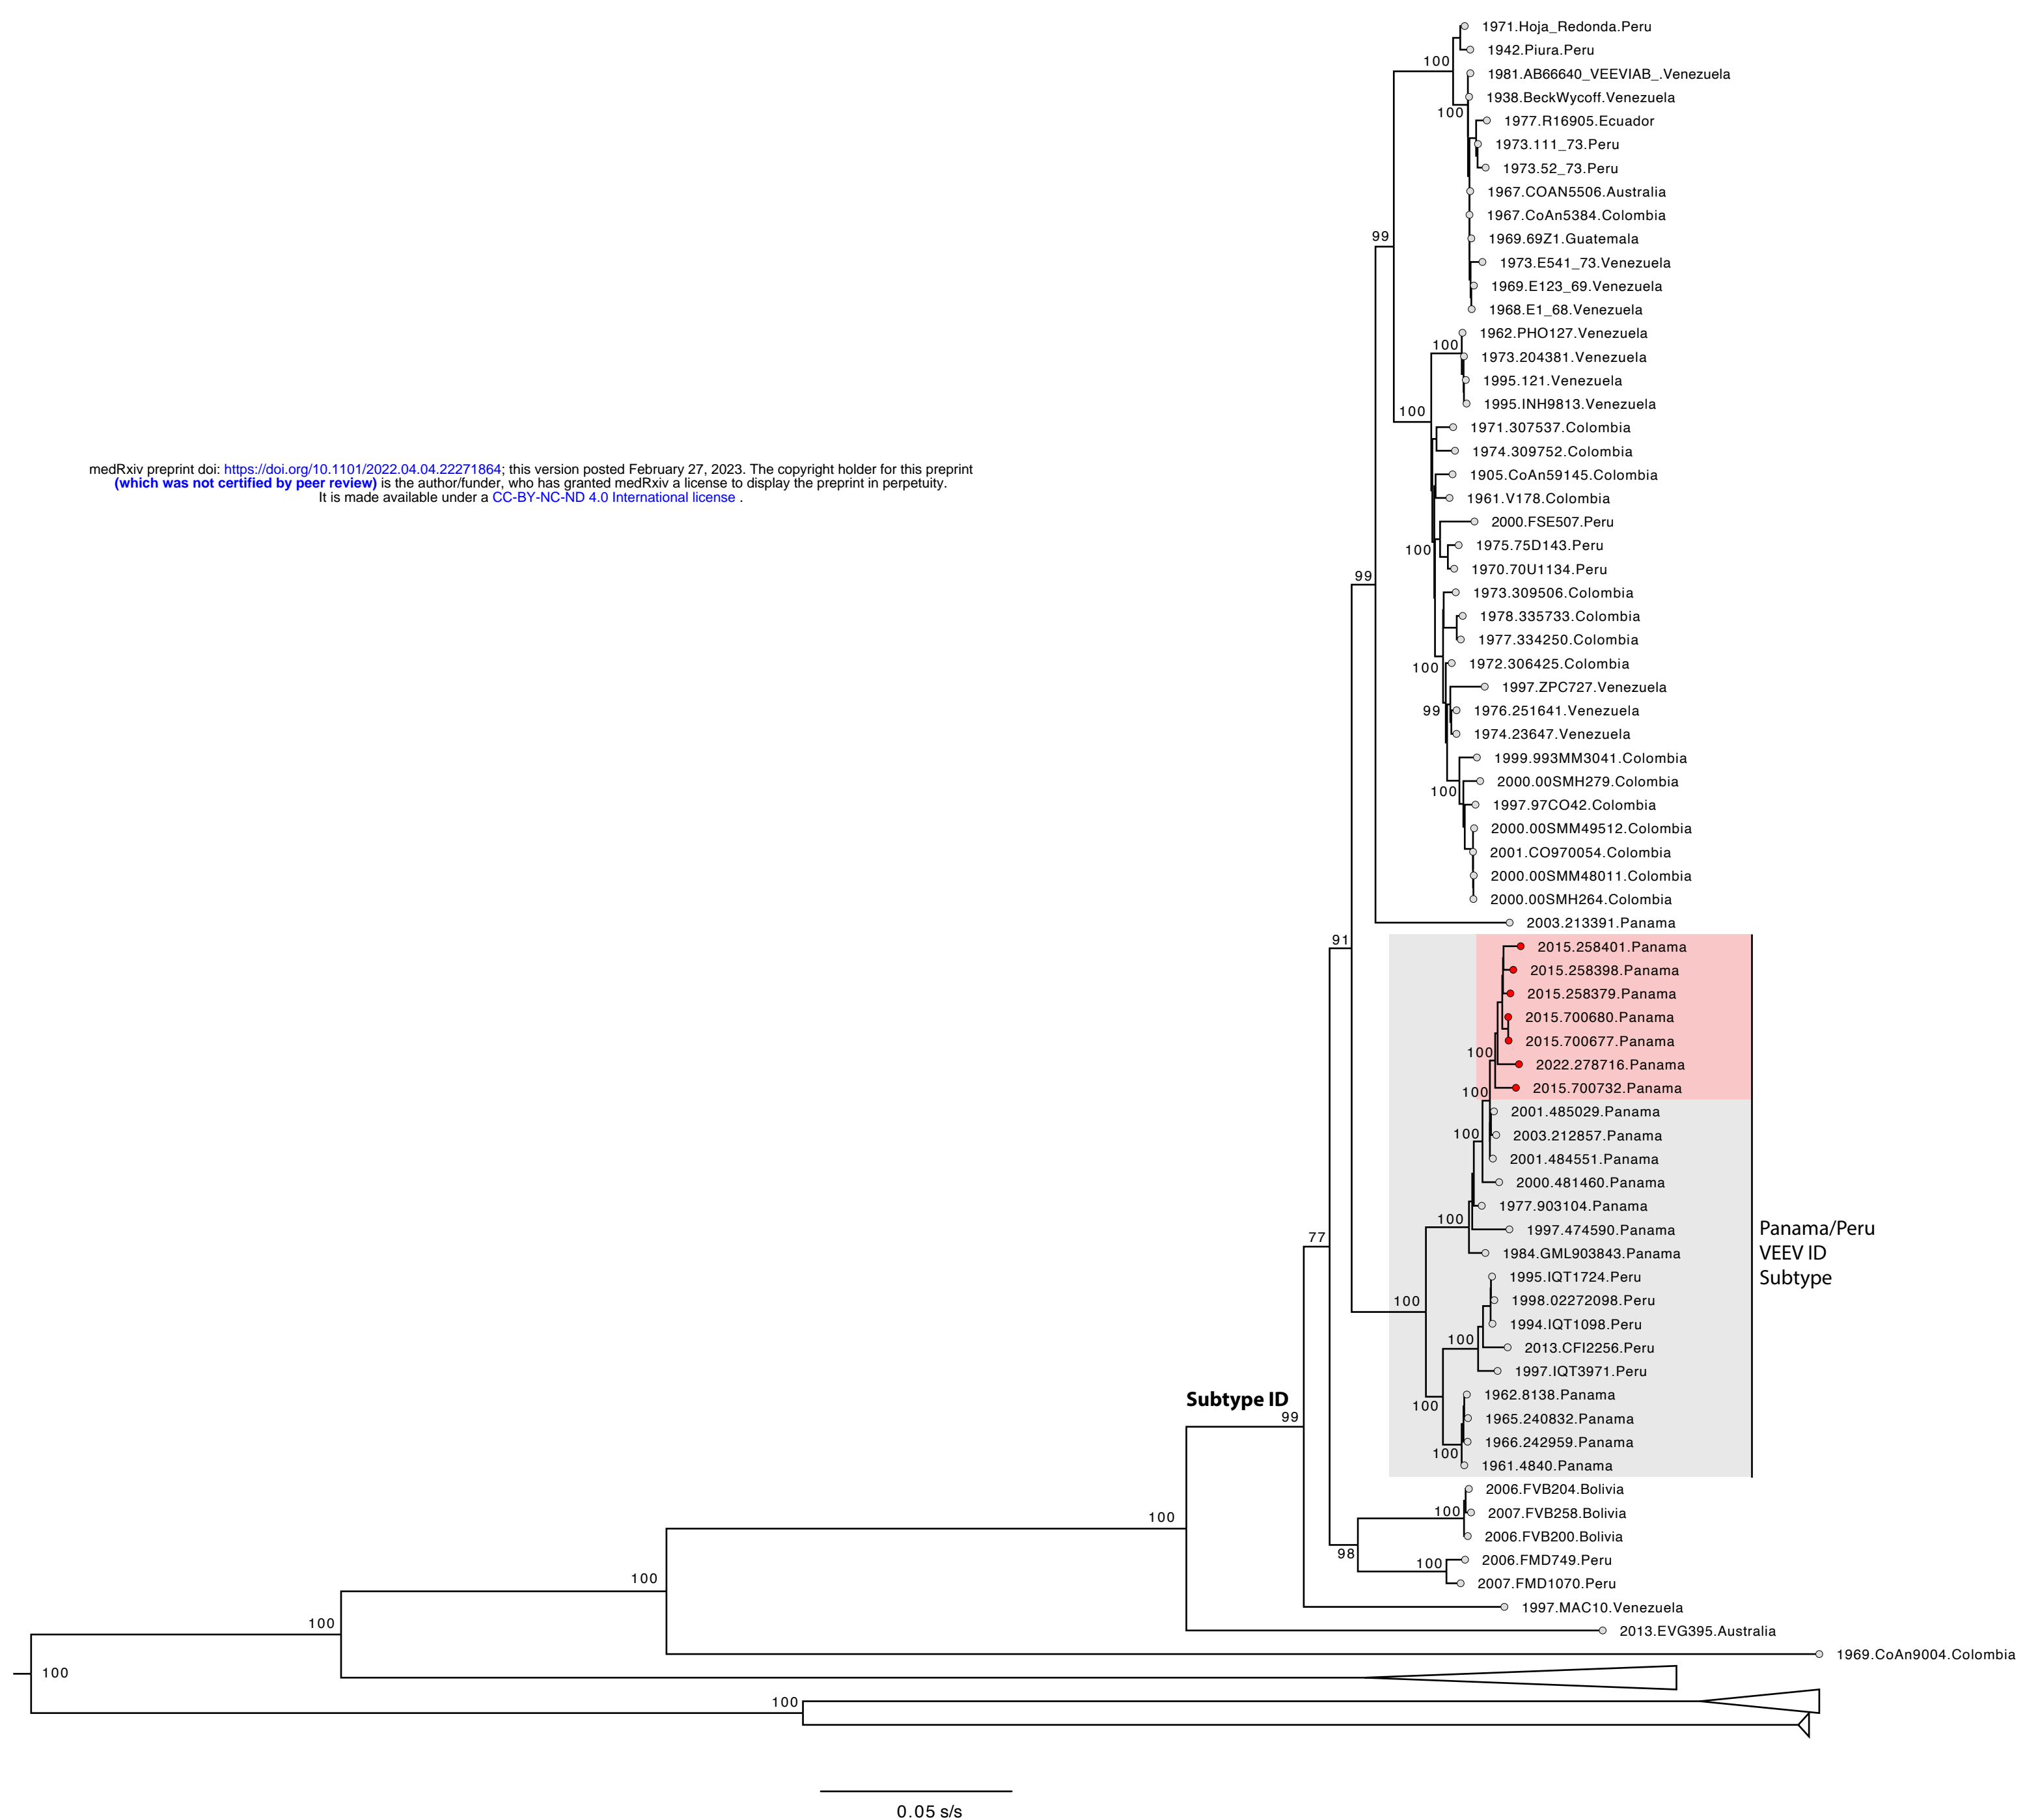

Source: https://www.medrxiv.org/content/10.1101/2022.04.04.22271864v2.full.pdf
